1 **Multi-model forecasts of the ongoing Ebola epidemic in the Democratic Republic of Congo,**

2 **March – October 2019**

3 Kimberlyn Roosa<sup>1\*</sup>, Amna Tariq<sup>1</sup>, Ping Yan<sup>2</sup>, James M. Hyman<sup>3</sup>, & Gerardo Chowell<sup>1, 4</sup>

4

5 <sup>1</sup>Department of Population Health Sciences, School of Public Health, Georgia State University,

6 Atlanta, GA, USA

7 <sup>2</sup>Infectious Disease Prevention and Control Branch, Public Health Agency of Canada, Ottawa,

8 Canada

9 <sup>3</sup>Department of Mathematics, Center for Computational Science, Tulane University, New

10 Orleans, LA, USA

11 <sup>4</sup>Division of International Epidemiology and Population Studies, Fogarty International

12 Center, National Institute of Health, Bethesda, MD, USA

13

14 \* Corresponding author: [kroosa1@student.gsu.edu](mailto:kroosa1@student.gsu.edu)

15

16

17

18

19

20

21

## 22 **Abstract**

23 The 2018-20 Ebola outbreak in the Democratic Republic of the Congo is the first to occur in an  
24 armed conflict zone. The resulting impact on population movement, treatment centers, and  
25 surveillance has created an unprecedented challenge for real-time epidemic forecasting. Most  
26 standard mathematical models cannot capture the observed incidence trajectory when it deviates  
27 from a traditional epidemic logistic curve. We fit seven dynamic models of increasing  
28 complexity to the incidence data published in the World Health Organization Situation Reports,  
29 after adjusting for reporting delays. These models include a simple logistic model, a Richards  
30 model, an endemic Richards model, a double logistic growth model, a multi-model approach,  
31 and two sub-epidemic models. We analyze model fit to the data and compare real-time forecasts  
32 throughout the ongoing epidemic across 29 weeks from March 11 to September 23, 2019. We  
33 observe that the modest extensions presented allow for capturing a wide range of epidemic  
34 behavior. The multi-model approach yields the most reliable forecasts on average for this  
35 application, and the presented extensions improve model flexibility and forecasting accuracy,  
36 even in the context of limited epidemiological data.

37

## 38 **Keywords**

39 real-time forecast, phenomenological models, Ebola, Democratic Republic of the Congo,  
40 uncertainty quantification, reporting delay

41

42

43

## 44 **Introduction**

45 There is a long, rich history of using mathematical models to study the spread and control of  
46 infectious diseases (1-3). For instance, mathematical models can provide insight on the impact of  
47 different transmission mechanisms and interventions (4-6), estimate transmission potential across  
48 different pathogens and social settings (7, 8), and evaluate optimal strategies for resource  
49 allocation (9, 10). Mathematical models can forecast, identify, and predict the morbidity and  
50 mortality patterns in infectious disease outbreaks in near real time (e.g., (10, 11)). Public health  
51 officials can use the model short-term projections to inform public health interventions during an  
52 outbreak (4, 12-18).

53 Many modeling studies rely on historical epidemic data to evaluate the effectiveness of the  
54 model for forecasting an epidemic (5, 6, 13, 15). In contrast, real-time studies aim to generate  
55 predictions as the epidemic unfolds (4, 7, 10-12, 19-21). These real-time studies present with  
56 additional challenges, as surveillance data is often affected by underreporting, misclassification,  
57 and reporting delays (21, 22). Fortunately, standard statistical methods can be useful to adjust  
58 short-term incidence trends for reporting delays and “nowcast” data in real time (21, 23, 24).

59 The 2018-20 Ebola epidemic in the Democratic Republic of the Congo (DRC) was initially  
60 declared on August 1, 2018. As of April 26, 2020, a total of 3461 cases have been reported,  
61 mostly in the provinces of North Kivu and Ituri, (with 6 cases from the province of South Kivu)  
62 (25). The outbreak has now largely been brought under control; however, small resurgences are  
63 still being reported over a year and a half after the start of the outbreak. Despite vaccination and  
64 other preventative efforts, the outbreak has persisted largely due to long-standing conflict in the  
65 region, including recurrent violent attacks targeting Ebola treatment centers and healthcare teams  
66 (25-27). Particularly, regions of North Kivu and Ituri have been destabilized, leading to conflict

67 from more than 70 armed militant groups (28). In addition to violence, a complicated history of  
68 humanitarian intervention has hindered the Ebola response efforts, impacting epidemiological  
69 surveillance and contact tracing efforts, including temporary suspension of Ebola response  
70 activities (22, 26, 28, 29). The multiple Ebola resurgences associated with these instabilities have  
71 resulted in a multimodal incidence pattern (see Figure S1) (7, 30). The complex characteristics  
72 and trajectory of this outbreak pose an unprecedented challenge for forecasting the trajectory of  
73 the epidemic in real time.

74 In February 2019, a sharp increase in cases and transmission were observed, coinciding with  
75 deteriorating security, targeted attacks on response teams, and decreasing trust in the Ebola  
76 response efforts (31, 32). Previous studies have provided real-time forecasts at different time  
77 points of the 2018-20 Ebola epidemic in the DRC (Figure S1) using various approaches,  
78 including a semi-structured model that relies on nowcasting (21), stochastic and auto-regressive  
79 models that incorporate historical data (20), as well as a sub-epidemic wave framework (30),  
80 which we also use here. While each of these approaches performed well for fitting and  
81 forecasting the trajectory of the outbreak in 2018 and early 2019, each model failed to predict the  
82 case resurgence observed in February 2019, resulting in forecasts that drastically underestimated  
83 the true cumulative case count to date. Therefore, we focus model calibration in this study on the  
84 large 2019 resurgence to better project the upcoming epidemic trajectory. This also allows for  
85 the implementation of simpler models, including models that only allow for a single peak.

86 We systematically compare real-time forecasts (1 - 4 weeks ahead) for the ongoing Ebola  
87 epidemic in the DRC using seven dynamic models of variable complexity. Our models range  
88 from simple scalar differential equation models, such as the standard logistic growth and  
89 Richards models, to more complex dynamic models that capture a diversity of epidemic

90 trajectories, such as multimodal outbreaks. These include extensions of the recently developed  
91 sub-epidemic wave framework consisting of systems of differential equations (30), an extended  
92 Richards model that incorporates an endemic state, and a double logistic growth model that  
93 supports incidence curves with two peaks (33). We also present a performance-based multi-  
94 model approach that incorporates the four single equation models in order of increasing  
95 complexity. We stratify forecasting performance within specific forecasting phases, as defined  
96 by the multi-model approach.

97

## 98 **Data and Methods**

### 99 *Incidence data of the DRC Ebola epidemic and adjusting for reporting delays*

100 We retrieve weekly case incidence data for the 2018-20 Ebola epidemic in the DRC from the  
101 epidemic curves published weekly in the World Health Organization (WHO) Situation Reports  
102 (25). The recurrent violent attacks and widespread public distrust have hindered the Ebola  
103 surveillance and containment efforts (26, 34) and resulted in delays in reporting the true  
104 incidence curve (22). Outbreak curves describing epidemic spread in near real-time can be  
105 distorted by reporting delays, so we adjust the crude incidence for reporting delays using  
106 statistical methods.

107 Reporting delay is defined as the time lag between the time of onset and the time when the case  
108 is reported and entered into the database (33). Reporting delays occur for multiple reasons  
109 including difficulty in tracing and monitoring cases, attacks on health workers and health centers,  
110 resistance of sick individuals to seek treatment as soon as symptoms occur, inefficient  
111 surveillance systems, and population mobility (35). We use a non-parametric actuaries method

112 that adapts survival analysis for use with right truncated data by employing point estimation  
113 based on reverse time hazards to statistically adjust for reporting delays based on the empirical  
114 distribution of the delays (23, 36-38). This allows us to estimate the number of occurred but not  
115 yet reported events at a given point in time due to incomplete case reporting.

116 This method involves expressing the conditional reporting delay distribution as the product of  
117 conditional probabilities. The adjusted incidence data are obtained by appropriately dividing the  
118 observed number of cases by the reporting delay distribution. Then we derive the 95% prediction  
119 limits using the statistical estimations introduced by Lawless, modified to assume non-stationary  
120 reporting delay probabilities, considering the most recent reporting period. This yields robust and  
121 realistic 95% prediction intervals (38, 39). We use weekly time intervals as a compromise  
122 between maximizing the temporal resolution and reporting irregularities in batch reporting of  
123 case counts and inaccuracies in retrospectively ascertained dates of onset. We sequentially  
124 analyze incidence data from Situation Reports as more information becomes available to adjust  
125 for reporting delays. All data are being made publicly available in a repository (40).

126

### 127 *Model calibration and forecasting approach*

128 We conducted 29 week-to-week forecasts between March 11 and September 23, 2019. Each  
129 forecast was fit to the reporting delay adjusted weekly incidence from data reported in Situation  
130 Reports 33 – 61, between March 19, 2019, and October 1, 2019. The uncertainty in the reporting  
131 delay is greatest in the most recently reported (last observed) weekly incidence data point; thus,  
132 we exclude the last weekly incidence data point in the analysis (lag of 1 week) (Figure S9). The  
133 first model calibration process relies on five incidence weeks: February 11 – March 11, 2019,

134 with the latest snapshot of the epidemic corresponding to Situation Report 33 (March 19, 2019).  
135 Sequentially, models are re-calibrated each week using the most up-to-date adjusted incidence  
136 curve; meaning, the length of the calibration period increases by one week with each new weekly  
137 published WHO Situation Report (25).

138 We estimate the model parameters,  $\Theta = (\theta_1, \theta_2, \dots, \theta_m)$ , in Table S1 from the data using nonlinear  
139 least squares fitting to minimize the sum of squared errors between the model prediction  
140  $f(t, \theta)$  and the data  $y_t$ . The parameters  $\hat{\Theta} = \text{argmin} \sum_{t=1}^n (f(t, \Theta) - y_t)^2$  define the best –  
141 fit model  $f(t, \hat{\Theta})$ . To test the uniqueness of the best-fit model, we initialize the parameters for  
142 the nonlinear least squares method over a wide range of feasible parameters from a uniform  
143 distribution using Latin hypercube sampling. Further, we fix the initial condition according to the  
144 first data point.

145 We use a parametric bootstrap approach to quantify parameter uncertainty and estimate  
146 prediction intervals, which involves resampling with replacement of incidence data assuming a  
147 Poisson error structure (41). Our calibration results represent  $M = 300$  resampled data sets that  
148 are refit to obtain  $M$  new parameter estimates. Model fits are used to obtain 95% confidence  
149 intervals for each parameter (41).

150 Each of the  $M$  model fits is used to generate  $m = 30$  simulated data curves with Poisson noise;  
151 these 9,000 ( $M \times m$ ) curves are then used to construct the 95% prediction intervals for the  
152 forecasting period of 1 – 4 weeks ( $h = 1, 2, 3, 4$ ). We give a detailed description of this parameter  
153 estimation method in prior studies (41-43).

154

155 *Performance metrics*

156 We used the following model performance metrics to assess the quality of the model fit and  
157 forecasting performance ( $h = 1 - 4$  weeks ahead). For calibration performance, we compare  
158 model fit to the adjusted observed data; whereas, we compare forecasts with the raw incidence  
159 data reported four weeks ahead of the last date of the calibration period.

160 The mean squared error (MSE) and the mean absolute error (MAE) assess average deviations of  
161 the model to the observed data:

$$MSE = \frac{1}{n} \sum_{i=1}^n (Y_i - \hat{Y}_i)^2$$

$$MAE = \frac{1}{n} \sum_{i=1}^n |Y_i - \hat{Y}_i|$$

162 where  $Y_i$  is the data,  $\hat{Y}_i$  is the model prediction, and  $n$  is the number of data points in the interval.  
163 For the calibration period,  $n$  equals the number of data points calibrated to, and for the  
164 forecasting period,  $n = h = 1, 2, 3, 4$  for 1 – 4 weeks ahead forecasts, respectively.

165 To assess model uncertainty and performance of prediction intervals, we use prediction interval  
166 coverage (PI coverage) and mean interval score (MIS) (44). Prediction interval coverage is the  
167 fraction of data points that fall within the 95% prediction interval; calculated as:

$$PI \text{ coverage} = \frac{1}{n} \sum_{t=1}^n \mathbf{1}\{Y_t > L_t \cap Y_t < U_t\}$$

168 where  $n$  is the length of the period,  $L_t$  and  $U_t$  are the lower and upper bounds of the 95%  
169 prediction intervals, respectively,  $Y_t$  are the data, and  $\mathbf{1}$  is an indicator variable that equals 1 if  $Y_t$   
170 is in the specified interval and 0 otherwise.



171 The mean interval score considers the width of the interval as well as the coverage, with a  
172 penalty for data points not included within the prediction intervals. The MIS is calculated as

$$MIS = \frac{1}{n} \sum_{t=1}^n (U_t - L_t) + \frac{2}{\alpha} (L_t - Y_t) \mathbf{1}\{Y_t < L_t\} + \frac{2}{\alpha} (Y_t - U_t) \mathbf{1}\{Y_t > U_t\}$$

173 where  $n$  is the length of the period,  $L_t$  and  $U_t$  are the lower and upper bounds of the 95%  
174 prediction intervals,  $Y_t$  are the data,  $\alpha$  is the significance level ( $\alpha = 0.05$ ), and  $\mathbf{1}$  is an indicator  
175 variable that equals 1 if  $Y_t$  is in the specified interval and 0 otherwise (44). Therefore, if the PI  
176 coverage is 1, the MIS is the average width of the interval across each time point. For two  
177 models with equivalent PI coverage, a lower MIS indicates narrower intervals.

178

### 179 *Forecasting strategy*

180 We evaluate short-term forecasts in real-time using seven dynamic models: four single-equation  
181 models of increasing complexity, a multi-model approach, and two sub-epidemic wave models  
182 whose complexity depends on the temporal pattern of the epidemic. Features such as number of  
183 parameters, number of equations, and ability to capture varying dynamics are provided in Table  
184 1. A brief overview of the models is provided below, and the Supplement contains additional  
185 details to fully define the models.

186 The 2-parameter logistic growth model is useful as a simple benchmark for comparing the  
187 performance of the more complex models. The well-known 3-parameter Richards model extends  
188 the logistic growth model to include an additional parameter to allow for asymmetry in the  
189 decline of the epidemic curve (45, 46). If the data follow a symmetric logistic trajectory, then the

190 logistic model can accurately fit the data. However, if the incidence is asymmetric, then the  
191 Richards model will yield a better fit.

192 We also introduce and apply an extension of the Richards model that consists of 5 parameters  
193 and an endemic state; therefore, we denote this the “endemic Richards” model (33). If the  
194 epidemic declines to a steady state or endemic level, rather than declining to extinction, the  
195 Richards model will under-predict the future incidence. When this happens, short-term forecasts  
196 derived using the endemic Richards model tend to outperform the simple Richards.

197 The model is then extended to a 6 parameter “double logistic” model that supports trajectories  
198 with double peaks or temporary steady states followed by a secondary decline (Figure S2) (33).  
199 When data points fall outside the PI of the endemic state assumed by the endemic Richards  
200 model, a decline greater than the assumed level of statistical noise is indicated; meaning, it is  
201 likely a true decline, rather than stochasticity. Therefore, the endemic Richards model will  
202 overpredict the incidence, and the double logistic model will be more appropriate.

203 We introduce a multi-model approach (see next section) that sequentially uses the four single-  
204 equation models mentioned above. For this purpose, we compare the models in order of  
205 increasing complexity (Table 1) and assess prediction interval coverage to determine which  
206 model to employ for the forecast. Our multi-model algorithm is summarized in Figure 1.

207 The most flexible model we use is a sub-epidemic wave model that supports complex temporal  
208 dynamic patterns, such as oscillating dynamics leading to endemic states or damped oscillations  
209 (30). We incorporate two variations of sub-epidemic decline: exponential decline, as presented in  
210 (30), and a new extension with an inverse decline function; each of the variations includes 5  
211 fitting parameters. This approach assumes that multiple underlying sub-epidemics shape the

212 aggregate reported epidemic curve, where each sub-epidemic is modeled using a generalized  
213 logistic growth model. These combine to create an epidemic wave composed of  $n$  overlapping  
214 sub-epidemics modeled using a system of  $n$  coupled differential equations.

215

### 216 Multi-model approach

217 For the multi-model approach, we compare the four single-equation models in order of  
218 increasing complexity (Table 1), and we assess the PI coverage of the calibration period to  
219 determine when/if to switch models, as summarized in our schematic shown in Figure 1.

220 We begin at the initial forecasting week by comparing the calibration PI coverage between the  
221 logistic and Richards models. When the calibration PI coverage of the logistic model is greater  
222 than or equal to the PI coverage of the Richards model, we provide forecasts with the logistic  
223 model. When the PI coverage of the Richards is greater, we then switch to comparing the  
224 Richards to the endemic Richards, and the iterative process continues as such (Figure 1).

225 We define the *forecasting phases* as the time intervals corresponding to the Situation Reports for  
226 which each model is used. That is, each time the method switches to a new forecasting model, a  
227 new forecasting phase is initiated, and there will be as many forecasting phases as models used.  
228 Notably, any number of the 4 models could make up the multi-model approach. For example, if  
229 the Richards model provides higher PI coverage than the logistic model at time  $t_{switch}$  and the  
230 endemic Richards model has higher PI coverage than the Richards at time  $t_{switch}$ , then the  
231 Richards model would not be used for any forecasts (Figure 1). The models are analyzed in the  
232 explicit order reported, and once a model is switched to, there is no switching back to simpler  
233 models.

234

## 235 **Results**

236 We compare the calibration and real-time short-term forecasting performance of the seven  
237 models in Table 1 on the major Ebola resurgence between March 11, 2019 and September 23,  
238 2019. We further assess performance within each forecasting phase, as defined by the multi-  
239 model approach. The Supplement contains additional figures of the model fits (Figures S3 – S8).

240

### 241 *Forecasting phases*

242 As explained in the methods, we define our *forecasting phases* by assessing the calibration PI  
243 coverage of the four single-equation models as defined by the multi-model approach (Figure S3).  
244 The following forecasting phases were obtained: weekly forecasts with the logistic model for  
245 March 11 – April 1, 2019 (data from Situation Reports 33 – 36), with the Richards model for  
246 April 8 – June 10, 2019 (Situation Reports 37 – 46), with the endemic Richards model for June  
247 17 – July 22, 2019 (Situation Reports 47 – 52), and with the double logistic for July 29 –  
248 September 23, 2019 (Situation Reports 53 – 61) (Figure 2). We will refer to these consecutive  
249 forecasting phases as: Incline, Oscillating I, Oscillating II, and Decline, respectively. These  
250 break points based on PI coverage are also consistent with the timing of where the models begin  
251 to deviate with respect to each of the other calibration performance metrics - MSE, MAE, and  
252 MIS (Figure 3).

253 In general, the resulting forecasting phases obtained by our multi-model approach are consistent  
254 with our rationale for incorporating the dynamic models supporting different dynamics. Data  
255 from February 11 – April 1 represent the early growth dynamics of the 2019 resurgence; thus, we

256 define the first phase (March 11 – April 1) as the Incline phase, for which the simple logistic  
257 model is sufficient for fitting the data (Figure S3).

258 In the next phase beginning April 8, Oscillating I, the outbreak begins to fluctuate, and the  
259 Richards model outperforms the logistic model. As new observations are added to the weekly  
260 incidence curve, the deviations between the logistic model and data become more pronounced  
261 (Figure 3 & S3). The trajectory continues on a sustained oscillating pattern through the next  
262 phase, Oscillating II, so the endemic Richards model provides a better model fit than the simple  
263 Richards model.

264 On July 29, the switch to the final model and the Decline phase is initiated (Figure 3). From July  
265 29 – September 2 (Situation Reports 53 – 58), the endemic Richards and double logistic model  
266 perform comparably in each of the calibration metrics. However, the double logistic model  
267 outperforms the endemic Richards model between September 9 – September 23 (Situation  
268 Reports 59 – 61). This is the point where the trajectory falls outside the 95% prediction interval  
269 obtained using the endemic Richards model, suggesting a need for a model that can capture the  
270 declining trend (Figures S6 & S7). The double logistic model outperforms the other single-  
271 equation models in capturing the full national incidence pattern up to September 23 (Table 2,  
272 Figure 3).

273

#### 274 *Calibration performance*

275 The calibration performance metrics across phases, based on the last date of calibration within  
276 each of the four phases, are given in Table 2. For data through the Incline phase, each of the  
277 models provides 100% PI coverage and very similar MIS, with the double logistic having the

278 lowest (MIS=27.1), followed by the endemic Richards (MIS=27.2). The endemic Richards  
279 model has significantly lower MSE and MAE for the Incline phase compared to the other models  
280 (Table 2).

281 For data through Oscillating I, the sub-epidemic model type II has the highest PI coverage  
282 (94.1%) and lowest MIS (70.9), while the endemic Richards and sub-epidemic type I have the  
283 lowest MSE and MAE, respectively (Table 2). For data through Oscillating II, the endemic  
284 Richards, multi-model, and the double logistic model have the highest PI coverage (95.7%),  
285 while sub-epidemic types I and II have the lowest MIS (49.7). The endemic Richards, which  
286 corresponds with the multi-model approach for Oscillating II, also has the lowest MSE and  
287 MAE.

288 When fitting all the available data through September 23, or the Decline phase, the double  
289 logistic, multi-model, and both sub-epidemic models perform best in terms of PI coverage  
290 (90.6%); however, the other metrics are split between these models (Table 2). The three simplest  
291 models perform poorly on the full data, supporting the need for more flexible models to capture  
292 the complex dynamics of the epidemic.

293 Weekly calibration performance across the entire incidence curve using the double logistic  
294 model, the performance-based multi-model approach, and the two sub-epidemic models are  
295 displayed in Figure 4. Goodness-of-fit metrics do not point to a single winner or ‘best’ model  
296 (Figure 4). In terms of mean model fit and error, the models perform comparably with regards to  
297 MSE and MAE. The models show variation in PI coverage and MIS; however, the curves  
298 repeatedly overlap, suggesting that there is not necessarily a clear best model across the full  
299 epidemic trajectory.

300

301 *Forecasting performance*

302 The forecasting results by phase are presented in Table 3. For the Incline phase, the endemic  
303 Richards model provides forecasts with substantially lower MSE and MAE than any other  
304 model. The double logistic model has the highest PI coverage (100%) and lowest MIS (207.3);  
305 however, the MSE is more than 14 times higher than that of the endemic Richards (Table 3).  
306 Thus, the high coverage can be attributed to very wide prediction intervals (Figure S6).

307 For Oscillating I, the endemic Richards model provides the highest PI coverage of future data  
308 points (65.0%), while the Richards model has the lowest MSE, MAE, and MIS, which correlates  
309 with the multi-model approach having the lowest error and MIS as well (Table 3).

310 As more complicated dynamics emerge, the simpler models fail to predict the epidemic  
311 trajectory accurately. For Oscillating II, both the logistic and Richards models have PI coverage  
312 of 0% with high error (Table 3). The sub-epidemic model type I, outperforms all other models on  
313 PI coverage (100%) and MIS (54.5) for this phase, indicating it has high PI coverage without  
314 significantly higher error. The endemic Richards, double logistic, and multi-model approach  
315 yield the lowest MAE and MSE for Oscillating II.

316 For the final phase, the Decline phase, the double logistic and multi-model approach yield the  
317 highest forecast PI coverage (80.6%). Interestingly, the simple Richards model provides  
318 forecasts with the lowest MIS, MSE, and MAE for the last phase; however, PI coverage is only  
319 55.6% (Table 4). Further, if we had continued conducting forecasts past the end of the study  
320 period, the Richards model would have failed to capture the continued endemic state observed.

321 The double logistic and multi-model approach rank second in MIS, MSE, and MAE, so while

322 there is not a clear best model, the double logistic and multi-model approach highly perform  
323 across all of the metrics.

324

## 325 **Discussion**

326 We conducted a systematic comparison of seven models for short-term real-time forecasting the  
327 ongoing 2018-20 Ebola outbreak in the DRC. A well-defined performance-based approach was  
328 used to identify distinct epidemic phases for which to employ different models to capture the  
329 complex trajectory of the epidemic. By using different models for different phases of an  
330 epidemic, the approach can account for significant changes in transmission dynamics over the  
331 course of the outbreak, ranging from a simple logistic curve to incidence curves with oscillatory  
332 behavior, as observed in the DRC (Figure 3).

333 The first defined phase, Incline, covers the sharp increase in cases observed in late February –  
334 early March, which followed an increase in armed attacks, including the burning of Ebola  
335 treatment centers in Katwa and Butembo (31). Specifically, February 2019 recorded the highest  
336 monthly incidence of armed attacks, corresponding with the increase in cases observed in the  
337 Incline phase. The following two phases represent oscillating dynamics, which correspond with  
338 continued violent attacks and increasing community resistance that deterred response activities  
339 (28, 31). As the incidence of violent attacks decreased in July 2019, cases leveled out and  
340 eventually showed a substantial decline for the final Decline phase.

341 The double logistic model and the sub-epidemic models (types I and II) provide the best fit to the  
342 incidence trajectory through the study period (Table 2); however, in general, goodness-of-fit was  
343 not found to be correlated with forecasting performance. While the sub-epidemic models often



344 provide the best fit to the calibration data (Table 2), they were less successful in forecasting  
345 short-term dynamics of the epidemic (Table 3). We observed that the sub-epidemic forecasts in  
346 the decline phase perform poorly, as the trajectory is declining while the models are predicting  
347 another upturn in cases or sub-epidemic waves (Figure S7 & S8). The sub-epidemic model, with  
348 an inverse decline function (type II), is more successful at capturing the future declining  
349 trajectory in the Situation Reports 58 – 61, whereas the version with the exponential decline  
350 (type I) cannot predict the declining trend observed in following weeks (Table 3; Figure S7 &  
351 S8).

352 The multi-model approach provides the most consistent forecasts, in terms of average MSE and  
353 MAE, throughout our study period (Table S2). Even when broken into phases, the multi-model  
354 approach performs best in at least one of the forecasting metrics for each forecasting phase,  
355 which was not the case for any other model (Table 3). This general multi-model approach can be  
356 adapted to other epidemic scenarios, such as epidemics of emerging pathogens or those occurring  
357 in regions with unstable sociopolitical climate, as the models are phenomenological and do not  
358 require biological information or knowledge of specific disease transmission processes.  
359 However, the four models incorporated here may not be appropriate for all outbreak scenarios.  
360 For example, these models do not allow for a higher second peak. This approach would also have  
361 failed to predict the February 2019 resurgence, like the other early projections.

362 The general multi-model approach can be adapted to incorporate any sequence of models. For  
363 disease outbreaks with more epidemiological data, specific disease mechanisms can be  
364 incorporated in compartmental models that increase in complexity as more outbreak  
365 characteristics are elucidated. As model complexity increases, however, the uncertainty of model  
366 estimates must be considered. Here, the models build upon each other and have very similar

367 estimates for the early phase, so we rely on PI coverage as our ‘switch’ metric to remain at a  
368 simpler model while they all have equivalent coverage. This could potentially be problematic for  
369 more complex models, as very wide intervals, such as  $(0, \text{inf.})$ , would perform ‘better’ in terms  
370 of PI coverage, leading to high uncertainty in forecasts. In this situation, one may consider MIS  
371 to classify the phases, rather than PI coverage.

372 Another modeling approach rapidly gaining traction in epidemiological literature is ensemble  
373 modeling, which involves incorporating multiple models in a complementary manner (47-49).  
374 Rather than a sequential multi-model approach, future work could rely on an ensemble modeling  
375 approach based on a combination of simple dynamic models. With an ensemble approach, we  
376 would have the option to base the contribution of each model on calibration performance, rather  
377 than choose one model based on calibration as we did here. Another option is to weight the  
378 models based on the forecasting performance of prior weeks; however, in this study, forecasting  
379 performance in one phase is not clearly predictive of performance in the following phase (Table  
380 3). The use of an algorithm like that presented here could supplement ensemble models to define  
381 distinct epidemic phases, which may yield better projections compared to separating data by  
382 standard intervals.

383 Reviews of real-time forecasting throughout the historic 2014-15 Ebola epidemic found that  
384 forecasting uncertainty is higher in the beginning stages of an outbreak and decreases over time  
385 (16, 17); however, this was not observed in the 2018-20 Ebola epidemic. Fluctuations in error  
386 and MIS do not reveal a declining pattern in forecast uncertainty as the epidemic progresses.  
387 This highlights the challenge of forecasting the complicated dynamics of this epidemic, where  
388 increasing the amount of available data does not necessarily decrease the uncertainty of  
389 estimates.

390 The unpredictable social components of the epidemic on the ground in the DRC are major  
391 limitations to the study. While we adjust the reported data in real-time by the week of symptom  
392 onset, we do not know the true stable incidence pattern when forecasts are generated. Further, we  
393 rely on phenomenological models, which are particularly valuable for providing rapid  
394 predictions of epidemic trajectory in complex scenarios; however, they do not incorporate  
395 disease-specific mechanisms or explicitly account for interventions. The sub-epidemic modeling  
396 framework is the most flexible presented here, and only the two sub-epidemic models can predict  
397 a resurgence. For the variations applied here, the models cannot predict a larger second wave, as  
398 observed in the DRC outbreak. Therefore, none of the models employed here would have  
399 anticipated the 2019 disease resurgence, but, when applied from the start of the resurgence, they  
400 can be used to forecast the following trajectory in real-time.

401 In conclusion, while the forecasting models introduced here are relatively simple, we are  
402 encouraged by the short-term forecasting performance of the model extensions, especially when  
403 applied to such a complex, non-traditional epidemic trajectory. This work suggests a multi-model  
404 framework, such as the one presented here, can identify distinct forecasting phases that allow the  
405 model to adjust for changing dynamics. Further, the general approach is flexible and can be  
406 adapted to many different model combinations and outbreak scenarios. Forecasting challenges  
407 during the DRC outbreak underscore the need for more research into flexible real-time  
408 forecasting approaches, especially when the dynamics exhibit complex temporal patterns.

409

410 *Acknowledgements*

411 We thank Homma Rafi (Director of Communications, School of Public Health, Georgia State  
412 University) for creating and maintaining the online record of weekly short-term forecasts.

413

414 *Funding*

415 GC is supported by NSF grants 1610429 and 1633381 and NIH R01 GM 130900

416

417 *Ethics*

418 Not applicable.

419

420 *Data, code, and materials*

421 Data will be made available in an online repository upon acceptance of the manuscript.

422

423 *Competing Interests*

424 Not applicable.

425

426 *Author Contributions*

427 KR and GC conducted the forecasts and data analysis; AT retrieved and adjusted data; KR wrote  
428 the first draft of manuscript; all authors contributed to writing and revising subsequent versions  
429 of the manuscript. All authors read and approved the final manuscript.

430

## 431 **Tables and Figures**

432 **Table 1.** Real-time forecasting comparison of seven dynamic models. The multi-model approach  
433 encompasses the four single-equation models in the first four rows (Figure 1).

|                         | <b># of fitting parameters</b> | <b># of differential equations</b> | <b>Supports endemic state</b> | <b>Supports two peaks</b> | <b>Supports oscillations</b> |
|-------------------------|--------------------------------|------------------------------------|-------------------------------|---------------------------|------------------------------|
| <b>Logistic</b>         | 2                              | 1                                  | No                            | No                        | No                           |
| <b>Richards</b>         | 3                              | 1                                  | No                            | No                        | No                           |
| <b>Endemic Richards</b> | 5                              | 1                                  | Yes                           | No                        | No                           |
| <b>Double logistic</b>  | 6                              | 1                                  | Yes                           | Yes                       | No                           |
| <b>Multi-model</b>      | 2 – 6                          | 1                                  | Yes                           | Yes                       | No                           |
| <b>Sub-epidemic I</b>   | 5                              | $\geq 1$ ( <i>n</i> )              | Yes                           | Yes                       | Yes                          |
| <b>Sub-epidemic II</b>  | 5                              | $\geq 1$ ( <i>n</i> )              | Yes                           | Yes                       | Yes                          |

434

435

436

437

438

439

440

441

442 **Table 2.** Calibration performance of each model for the last calibration endpoint of the time  
443 intervals defined by the multi-model approach

444

|                                                 | PI Coverage (%) | MIS          | MSE           | MAE          |     |
|-------------------------------------------------|-----------------|--------------|---------------|--------------|-----|
|                                                 |                 |              |               |              | 445 |
| <b>April 1, 2019</b>                            |                 |              |               |              | 447 |
| <b>(Situation Report 36)</b>                    |                 |              |               |              |     |
| <i>Logistic</i>                                 | <b>100.0*</b>   | 28.4         | 17.8          | 3.0          | 448 |
| <i>Richards</i>                                 | <b>100.0*</b>   | 29.4         | 15.2          | 2.9          | 449 |
| <i>Endemic Richards</i>                         | <b>100.0*</b>   | 27.2         | <b>6.4*</b>   | <b>2.1*</b>  | 450 |
| <i>Double logistic</i>                          | <b>100.0*</b>   | <b>27.1*</b> | 23.2          | 3.8          | 451 |
| <i>Multi-model</i>                              | <b>100.0*</b>   | 28.4         | 17.8          | 3.0          | 452 |
| <i>Sub-epidemic I</i>                           | <b>100.0*</b>   | 28.6         | 13.9          | 2.7          | 453 |
| <i>Sub-epidemic II</i>                          | <b>100.0*</b>   | 28.7         | 13.9          | 2.9          | 454 |
| <b>June 10, 2019 (Situation Report 46)</b>      |                 |              |               |              | 455 |
| <i>Logistic</i>                                 | 52.9            | 302.9        | 511.2         | 17.4         | 456 |
| <i>Richards</i>                                 | 88.2            | 81.9         | 220.0         | 12.1         | 457 |
| <i>Endemic Richards</i>                         | 88.2            | 84.2         | <b>199.9*</b> | 11.7         | 458 |
| <i>Double logistic</i>                          | 82.4            | 85.7         | 200.7         | 11.7         | 459 |
| <i>Multi-model</i>                              | 88.2            | 81.9         | 220.0         | 12.1         | 460 |
| <i>Sub-epidemic I</i>                           | 82.4            | 74.7         | 213.8         | <b>11.1*</b> | 461 |
| <i>Sub-epidemic II</i>                          | <b>94.1*</b>    | <b>70.9*</b> | 213.2         | 11.4         | 462 |
| <b>July 22, 2019 (Situation Report 52)</b>      |                 |              |               |              | 463 |
| <i>Logistic</i>                                 | 34.8            | 696.0        | 1191.8        | 28.3         | 464 |
| <i>Richards</i>                                 | 65.2            | 153.3        | 306.7         | 12.7         | 465 |
| <i>Endemic Richards</i>                         | <b>95.7*</b>    | 54.6         | <b>124.9*</b> | <b>8.6*</b>  | 466 |
| <i>Double logistic</i>                          | <b>95.7*</b>    | 60.3         | 129.0         | 8.7          | 467 |
| <i>Multi-model</i>                              | <b>95.7*</b>    | 54.6         | <b>124.9*</b> | <b>8.6*</b>  | 468 |
| <i>Sub-epidemic I</i>                           | 87.0            | <b>49.7*</b> | 129.8         | 9.4          | 469 |
| <i>Sub-epidemic II</i>                          | 87.0            | <b>49.7*</b> | 129.9         | 9.4          | 470 |
| <b>September 23, 2019 (Situation Report 61)</b> |                 |              |               |              | 471 |
| <i>Logistic</i>                                 | 21.9            | 732.78       | 1281.7        | 30.6         | 472 |
| <i>Richards</i>                                 | 71.9            | 139.1        | 312.0         | 14.1         | 473 |
| <i>Endemic Richards</i>                         | 75.0            | 117.9        | 210.7         | 10.9         | 474 |
| <i>Double logistic</i>                          | <b>90.6*</b>    | 55.3         | <b>110.9*</b> | 7.8          | 475 |
| <i>Multi-model</i>                              | <b>90.6*</b>    | 55.3         | <b>110.9*</b> | 7.8          | 476 |
| <i>Sub-epidemic I</i>                           | <b>90.6*</b>    | <b>52.7*</b> | 126.6         | 8.9          | 477 |
| <i>Sub-epidemic II</i>                          | <b>90.6*</b>    | 61.5         | 122.2         | <b>7.5*</b>  | 478 |

\* Best perform

470 ance with regards to the metric (column); i.e. highest PI coverage, lowest MIS, MSE, MAE.

471

472 **Table 3.** Average forecasting performance of 4-week ahead forecasts across Situation Reports  
 473 within four distinct forecasting phases, as defined by the multi-model calibration results  
 474 (corresponding with Figure 2). Note: the metrics for the multi-model approach will be equivalent

|                                       | PI<br>Coverage<br>(%) | MIS           | MSE            | MAE                        | 475 to the<br>476 individual<br>477 model used in<br>478 their<br>479 respective<br>480 time intervals. |
|---------------------------------------|-----------------------|---------------|----------------|----------------------------|---------------------------------------------------------------------------------------------------------|
| <b>Sit Reps 33-36: Incline</b>        |                       |               |                |                            |                                                                                                         |
| <i>Logistic</i>                       | 68.8                  | 553.5         | 1857.5         | 37.5 <sup>480</sup>        |                                                                                                         |
| <i>Richards</i>                       | 81.3                  | 428.5         | 2072.1         | 36.1 <sup>481</sup>        |                                                                                                         |
| <i>Endemic Richards</i>               | 81.3                  | 247.9         | <b>580.0*</b>  | <b>18.6*</b>               |                                                                                                         |
| <i>Double logistic**</i>              | <b>100.0*</b>         | <b>207.3*</b> | 8308.6         | 66.4 <sup>482</sup>        |                                                                                                         |
| <i>Multi-model</i>                    | 68.8                  | 553.5         | 1857.5         | 37.5                       |                                                                                                         |
| <i>Sub-epidemic I</i>                 | 56.3                  | 672.3         | 3987.3         | 46.0 <sup>483</sup>        |                                                                                                         |
| <i>Sub-epidemic II</i>                | 56.3                  | 646.1         | 4050.6         | 45.4 <sup>484</sup>        |                                                                                                         |
| <b>Sit Reps 37-46: Oscillating I</b>  |                       |               |                |                            |                                                                                                         |
| <i>Logistic</i>                       | 37.5                  | 859.2         | 1951.3         | 36.7 <sup>485</sup>        |                                                                                                         |
| <i>Richards</i>                       | 55.0                  | <b>468.7*</b> | <b>1883.0*</b> | <b>33.9*</b>               |                                                                                                         |
| <i>Endemic Richards</i>               | <b>65.0*</b>          | 494.4         | 4613.2         | 51.1 <sup>486</sup>        |                                                                                                         |
| <i>Double logistic</i>                | 55.0                  | 559.9         | 5922.6         | 56.2 <sup>487</sup>        |                                                                                                         |
| <i>Multi-model</i>                    | 55.0                  | <b>468.7*</b> | <b>1883.0*</b> | <b>33.9*</b>               |                                                                                                         |
| <i>Sub-epidemic I</i>                 | 42.5                  | 794.3         | 4123.0         | 46.0 <sup>488</sup>        |                                                                                                         |
| <i>Sub-epidemic II</i>                | 45.0                  | 889.1         | 4424.7         | 50.1 <sup>489</sup>        |                                                                                                         |
| <b>Sit Reps 47-52: Oscillating II</b> |                       |               |                |                            |                                                                                                         |
| <i>Logistic</i>                       | 0.0                   | 2192.5        | 4039.0         | 62.9 <sup>490</sup>        |                                                                                                         |
| <i>Richards</i>                       | 0.0                   | 684.4         | 1081.4         | 31.7                       |                                                                                                         |
| <i>Endemic Richards</i>               | 87.5                  | 71.3          | 131.6          | <b>8.7*</b> <sup>491</sup> |                                                                                                         |
| <i>Double logistic</i>                | 87.5                  | 68.7          | <b>129.8*</b>  | 8.8                        |                                                                                                         |
| <i>Multi-model</i>                    | 87.5                  | 71.3          | 131.6          | <b>8.7*</b> <sup>492</sup> |                                                                                                         |
| <i>Sub-epidemic I</i>                 | <b>100.0*</b>         | <b>54.5*</b>  | 208.1          | 12.6 <sup>493</sup>        |                                                                                                         |
| <i>Sub-epidemic II</i>                | 79.2                  | 88.1          | 344.9          | 15.1                       |                                                                                                         |
| <b>Sit Reps 53-61: Decline</b>        |                       |               |                |                            |                                                                                                         |
| <i>Logistic</i>                       | 8.3                   | 837.8         | 1026.4         | 27.8 <sup>495</sup>        |                                                                                                         |
| <i>Richards</i>                       | 55.6                  | <b>115.1*</b> | <b>183.7*</b>  | <b>11.9*</b>               |                                                                                                         |
| <i>Endemic Richards</i>               | 16.7                  | 784.1         | 1482.4         | 36.4 <sup>496</sup>        |                                                                                                         |
| <i>Double logistic</i>                | <b>80.6*</b>          | 118.5         | 304.5          | 13.2                       |                                                                                                         |
| <i>Multi-model</i>                    | <b>80.6*</b>          | 118.5         | 304.5          | 13.2 <sup>497</sup>        |                                                                                                         |
| <i>Sub-epidemic I</i>                 | 63.9                  | 401.4         | 747.0          | 20.4 <sup>498</sup>        |                                                                                                         |
| <i>Sub-epidemic II</i>                | 69.4                  | 219.5         | 453.7          | 14.4                       |                                                                                                         |

499

500

501

502

503 \* Best performance with regards to the metric (column); i.e. highest PI coverage, lowest MIS,  
504 MSE, MAE

505 \*\* The double logistic model averages are for Sit Reps 35 – 36.

506

507 **Figure 1.** Schematic for the performance-based multi-model approach. This describes the  
508 process of choosing models to provide forecasts for each weekly projection.

509 **Figure 2.** Visual representation of the forecasting phases defined by the multi-model approach.

510 Raw data from Situation Report 65 is shown with the periods for which each model was used:  
511 logistic growth model (blue), Richards model (red), endemic Richards (yellow), and double  
512 logistic (purple).

513 **Figure 3.** Calibration period metrics for the 4 models included in the performance-based multi-  
514 model approach: logistic growth model (blue), Richards model (red), endemic Richards (yellow),  
515 and double logistic (purple). Prediction interval coverage is used to indicate the ‘switch’ in  
516 models

517 **Figure 4.** Calibration period metrics across all Situation Reports for the double logistic (blue),  
518 multi-model (red), and sub-epidemic types I (yellow) and II (purple).

519 **Figure 5.** Forecasting period metrics for  $h = 4$  across all Situation Reports for the double  
520 logistic (blue), multi-model (red), and sub-epidemic types I (yellow) and II (purple).

521

## 522 **References**

- 523 1. Anderson RM, May RM. Infectious Diseases of Humans: Dynamics and Control 1991.  
524 2. Kermack WO, McKendrick AG. Contributions to the mathematical theory of epidemics--I. 1927.  
525 Bulletin Of Mathematical Biology. 1991;53(1-2):33-55.



- 526 3. Diekmann O, Heesterbeek JA, Metz JA. On the definition and the computation of the basic  
527 reproduction ratio  $R_0$  in models for infectious diseases in heterogeneous populations. *Journal Of*  
528 *Mathematical Biology*. 1990;28(4):365-82.
- 529 4. Ajelli M, Merler S, Pugliese A, Rizzo C. Model predictions and evaluation of possible control  
530 strategies for the 2009 A/H1N1v influenza pandemic in Italy. *Epidemiology and Infection*.  
531 2011;139(1):68.
- 532 5. Poletti P, Messeri G, Ajelli M, Vallorani R, Rizzo C, Merler S. Transmission Potential of  
533 Chikungunya Virus and Control Measures: The Case of Italy. *PLoS ONE*. 2011;6(5):1-12.
- 534 6. Barbarossa MV, Dénes A, Kiss G, Nakata Y, Röst G, Vizi Z. Transmission Dynamics and Final  
535 Epidemic Size of Ebola Virus Disease Outbreaks with Varying Interventions. *PLoS ONE*. 2015;10(7):1-21.
- 536 7. Mizumoto K, Tariq A, Roosa K, Kong J, Yan P, Chowell G. Spatial variability in the reproduction  
537 number of Ebola virus disease, Democratic Republic of the Congo, January–September 2019. *Euro*  
538 *Surveill*. 2019;24(42).
- 539 8. Keeling M, Woolhouse M, Shaw D, Matthews L, Chase-Topping M, Haydon D, et al. Dynamics of  
540 the 2001 UK Foot and Mouth Epidemic: Stochastic Dispersal in a Heterogeneous Landscape. *Science*.  
541 2001;294(5543):813.
- 542 9. Zelman B, Kiszewski A, Cotter C, Liu J. Costs of Eliminating Malaria and the Impact of the Global  
543 Fund in 34 Countries. *PLoS ONE*. 2014;9(12):1-17.
- 544 10. Abrams J, Copeland R, Tauxe R, Date K, Belay E, Mody R, et al. Real-time modelling used for  
545 outbreak management during a cholera epidemic, Haiti, 2010—2011. *Epidemiology and Infection*.  
546 2013;141(6):1276.
- 547 11. Camacho A, Kucharski A, Aki-Sawyer Y, White MA, Flasche S, Baguelin M, et al. Temporal  
548 Changes in Ebola Transmission in Sierra Leone and Implications for Control Requirements: a Real-time  
549 Modelling Study. *Plos Currents*. 2015;7.
- 550 12. Funk S, Camacho A, Kucharski AJ, Eggo RM, Edmunds WJ. Real-time forecasting of infectious  
551 disease dynamics with a stochastic semi-mechanistic model. *Epidemics*. 2016;22:56-61.
- 552 13. Shanafelt DW, Jones G, Lima M, Perrings C, Chowell G. Forecasting the 2001 Foot-and-Mouth  
553 Disease Epidemic in the UK. *Ecohealth*. 2017.
- 554 14. Johansson MA, Reich NG, Hota A, Brownstein JS, Santillana M. Evaluating the performance of  
555 infectious disease forecasts: A comparison of climate-driven and seasonal dengue forecasts for Mexico.  
556 *Scientific Reports*. 2016;6:33707-.
- 557 15. Funk S, Camacho A, Kucharski AJ, Lowe R, Eggo RM, Edmunds WJ. Assessing the performance of  
558 real-time epidemic forecasts: A case study of Ebola in the Western Area region of Sierra Leone, 2014-15.  
559 *PLoS Computational Biology*. 2019;15(2):1-17.
- 560 16. Carias C, O'Hagan JJ, Gambhir M, Kahn EB, Swerdlow DL, Meltzer MI. Forecasting the 2014 West  
561 African Ebola Outbreak. *Epidemiologic Reviews*. 2019.
- 562 17. Chowell G, Viboud C, Simonsen L, Merler S, Vespignani A. Perspectives on model forecasts of the  
563 2014-2015 Ebola epidemic in West Africa: lessons and the way forward. *BMC Medicine*. 2017;15(1):42-.
- 564 18. Hsieh Y, Cheng Y. Real-time Forecast of Multiphase Outbreak. *Emerging Infectious Diseases*.  
565 2006(1):122.
- 566 19. Kelly JD, Park J, Harrigan RJ, Hoff NA, Lee SD, Wannier R, et al. Real-time predictions of the  
567 2018–2019 Ebola virus disease outbreak in the Democratic Republic of the Congo using Hawkes point  
568 process models. *Epidemics*. 2019;28.
- 569 20. Worden L, Wannier R, Hoff NA, Musene K, Selo B, Mossoko M, et al. Projections of epidemic  
570 transmission and estimation of vaccination impact during an ongoing Ebola virus disease outbreak in  
571 Northeastern Democratic Republic of Congo, as of Feb. 25, 2019. *PLoS Neglected Tropical Diseases*.  
572 2019;13(8):1-20.

- 573 21. Akhmetzhanov AR, Lee H, Jung S-m, Kayano T, Yuan B, Nishiura H. Analyzing and forecasting the  
574 Ebola incidence in North Kivu, the Democratic Republic of the Congo from 2018–19 in real time.  
575 *Epidemics*. 2019;27:123-31.
- 576 22. Tariq A, Roosa K, Mizumoto K, Chowell G. Assessing reporting delays and the effective  
577 reproduction number: The Ebola epidemic in DRC, May 2018–January 2019. *Epidemics*. 2019(128-  
578 133):128.
- 579 23. Lawless JF. Adjustments for reporting delays and the prediction of occurred but not reported  
580 events. *Canadian Journal of Statistics*. 1994;22(1):15-31.
- 581 24. Taylor GC. *Claims Reserving In Non Life Insurance*. Elsevier; 1985.
- 582 25. WHO. Ebola Virus Disease Democratic Republic of Congo: External Situation Reports. Ebola  
583 health update - DRC, 2019 [Internet]. 2018-19; (1-59). Available from:  
584 <https://www.who.int/emergencies/diseases/ebola/drc-2019/situation-reports>.
- 585 26. Wannier SR, Worden L, Hoff NA, Amezcua E, Selo B, Sinai C, et al. Estimating the impact of  
586 violent events on transmission in Ebola virus disease outbreak, Democratic Republic of the Congo, 2018–  
587 2019. *Epidemics*. 2019(-).
- 588 27. Ebola Outbreak Epidemiology Team. Outbreak of Ebola virus disease in the Democratic Republic  
589 of the Congo, April-May, 2018: an epidemiological study. *Lancet* (London, England).  
590 2018;392(10143):213-21.
- 591 28. Wells CR, Pandey A, Ndeffo Mbah ML, Gaüzère B-A, Malvy D, Singer BH, et al. The exacerbation  
592 of Ebola outbreaks by conflict in the Democratic Republic of the Congo. *Proceedings of the National*  
593 *Academy of Sciences of the United States of America*. 2019;116(48):24366-72.
- 594 29. Vinck P, Pham PN, Bindu KK, Bedford J, Nilles EJ. Institutional trust and misinformation in the  
595 response to the 2018–19 Ebola outbreak in North Kivu, DR Congo: a population-based survey. *The*  
596 *Lancet Infectious Diseases*. 2019;19(5):529-36.
- 597 30. Chowell G, Tariq A, Hyman JM. A novel sub-epidemic modeling framework for short-term  
598 forecasting epidemic waves. *BMC Medicine*. 2019;17(1):164-.
- 599 31. Kalenga OI, Moeti M, Sparrow A, Vinh-Kim N, Lucey D, Ghebreyesus TA, et al. The Ongoing Ebola  
600 Epidemic in the Democratic Republic of Congo, 2018-2019. *New England Journal of Medicine*.  
601 2019;381(4):373-83.
- 602 32. WHO. Ebola Virus Disease, Democratic Republic of the Congo, External Situation Report 56.  
603 World Health Organization; 2019.
- 604 33. Yan P, Chowell G. *Quantitative Methods for Investigating Infectious Disease Outbreaks*:  
605 Springer; 2019.
- 606 34. Claude KM, Underschultz J, Hawkes MT. Ebola virus epidemic in war-torn eastern DR Congo. *The*  
607 *Lancet*. 2018;392(10156):1399-401.
- 608 35. Shearer M. Ebola contact tracing and monitoring in DRC. Center for Health Security: John  
609 Hopkins Bloomberg School of Public Health 2018.
- 610 36. Taylor GC. *Claims Reserving In Non Life Insurance*: Elsevier; 1985.
- 611 37. Brookmeyer R, Gail MH. *AIDS Epidemiology: A Quantitative Approach*: Oxford University Press;  
612 1994.
- 613 38. BROOKMEYER R, LIAO J. THE ANALYSIS OF DELAYS IN DISEASE REPORTING: METHODS AND  
614 RESULTS FOR THE ACQUIRED IMMUNODEFICIENCY SYNDROME. *American Journal of Epidemiology*.  
615 1990;132(2):355-65.
- 616 39. Lawless JF. Adjustments for reporting delays and the prediction of occurred but not reported  
617 events. 1994;22(1):15-31.
- 618 40. Data files for Multi-model forecasts of the ongoing Ebola epidemic in the Democratic Republic of  
619 Congo, March - October 2019 [Internet]. 2019.

- 620 41. Chowell G. Fitting dynamic models to epidemic outbreaks with quantified uncertainty: A primer  
621 for parameter uncertainty, identifiability, and forecasts. *Infectious Disease Modelling*. 2017;2:379-98.
- 622 42. Roosa K, Chowell G. Assessing parameter identifiability in compartmental dynamic models using  
623 a computational approach: Application to infectious disease transmission models. *Theoretical Biology*  
624 *and Medical Modelling*. 2019;16(1).
- 625 43. Roosa K, Luo R, Chowell G. Comparative assessment of parameter estimation methods in the  
626 presence of overdispersion: a simulation study. *Mathematical Biosciences and Engineering*.  
627 2019;16(5):4299-313.
- 628 44. Gneiting T, Raftery AE. Strictly Proper Scoring Rules, Prediction, and Estimation. *Journal of the*  
629 *American Statistical Association*. 2007;102(477):359.
- 630 45. Richards F. A flexible growth function for empirical use. *Journal of Experimental Botany*.  
631 1959;10(2):290-301.
- 632 46. Wang X-S, Wu J, Yang Y. Richards model revisited: Validation by and application to infection  
633 dynamics. *Journal of Theoretical Biology*. 2012;313:12-9.
- 634 47. Chowell G, Luo R, Sun K, Roosa K, Tariq A, Viboud C. Real-time forecasting of epidemic  
635 trajectories using computational dynamic ensembles. *Epidemics*. 2020;30.
- 636 48. Reich NG, McGowan CJ, Yamana TK, Tushar A, Ray EL, Osthus D, et al. Accuracy of real-time  
637 multi-model ensemble forecasts for seasonal influenza in the U.S. *PLoS Computational Biology*.  
638 2019;15(11):1-19.
- 639 49. Reich NG, Brooks LC, Fox SJ, Kandula S, McGowan CJ, Moore E, et al. A collaborative multiyear,  
640 multimodel assessment of seasonal influenza forecasting in the United States. *Proceedings Of The*  
641 *National Academy Of Sciences Of The United States Of America*. 2019;116(8):3146-54.

642

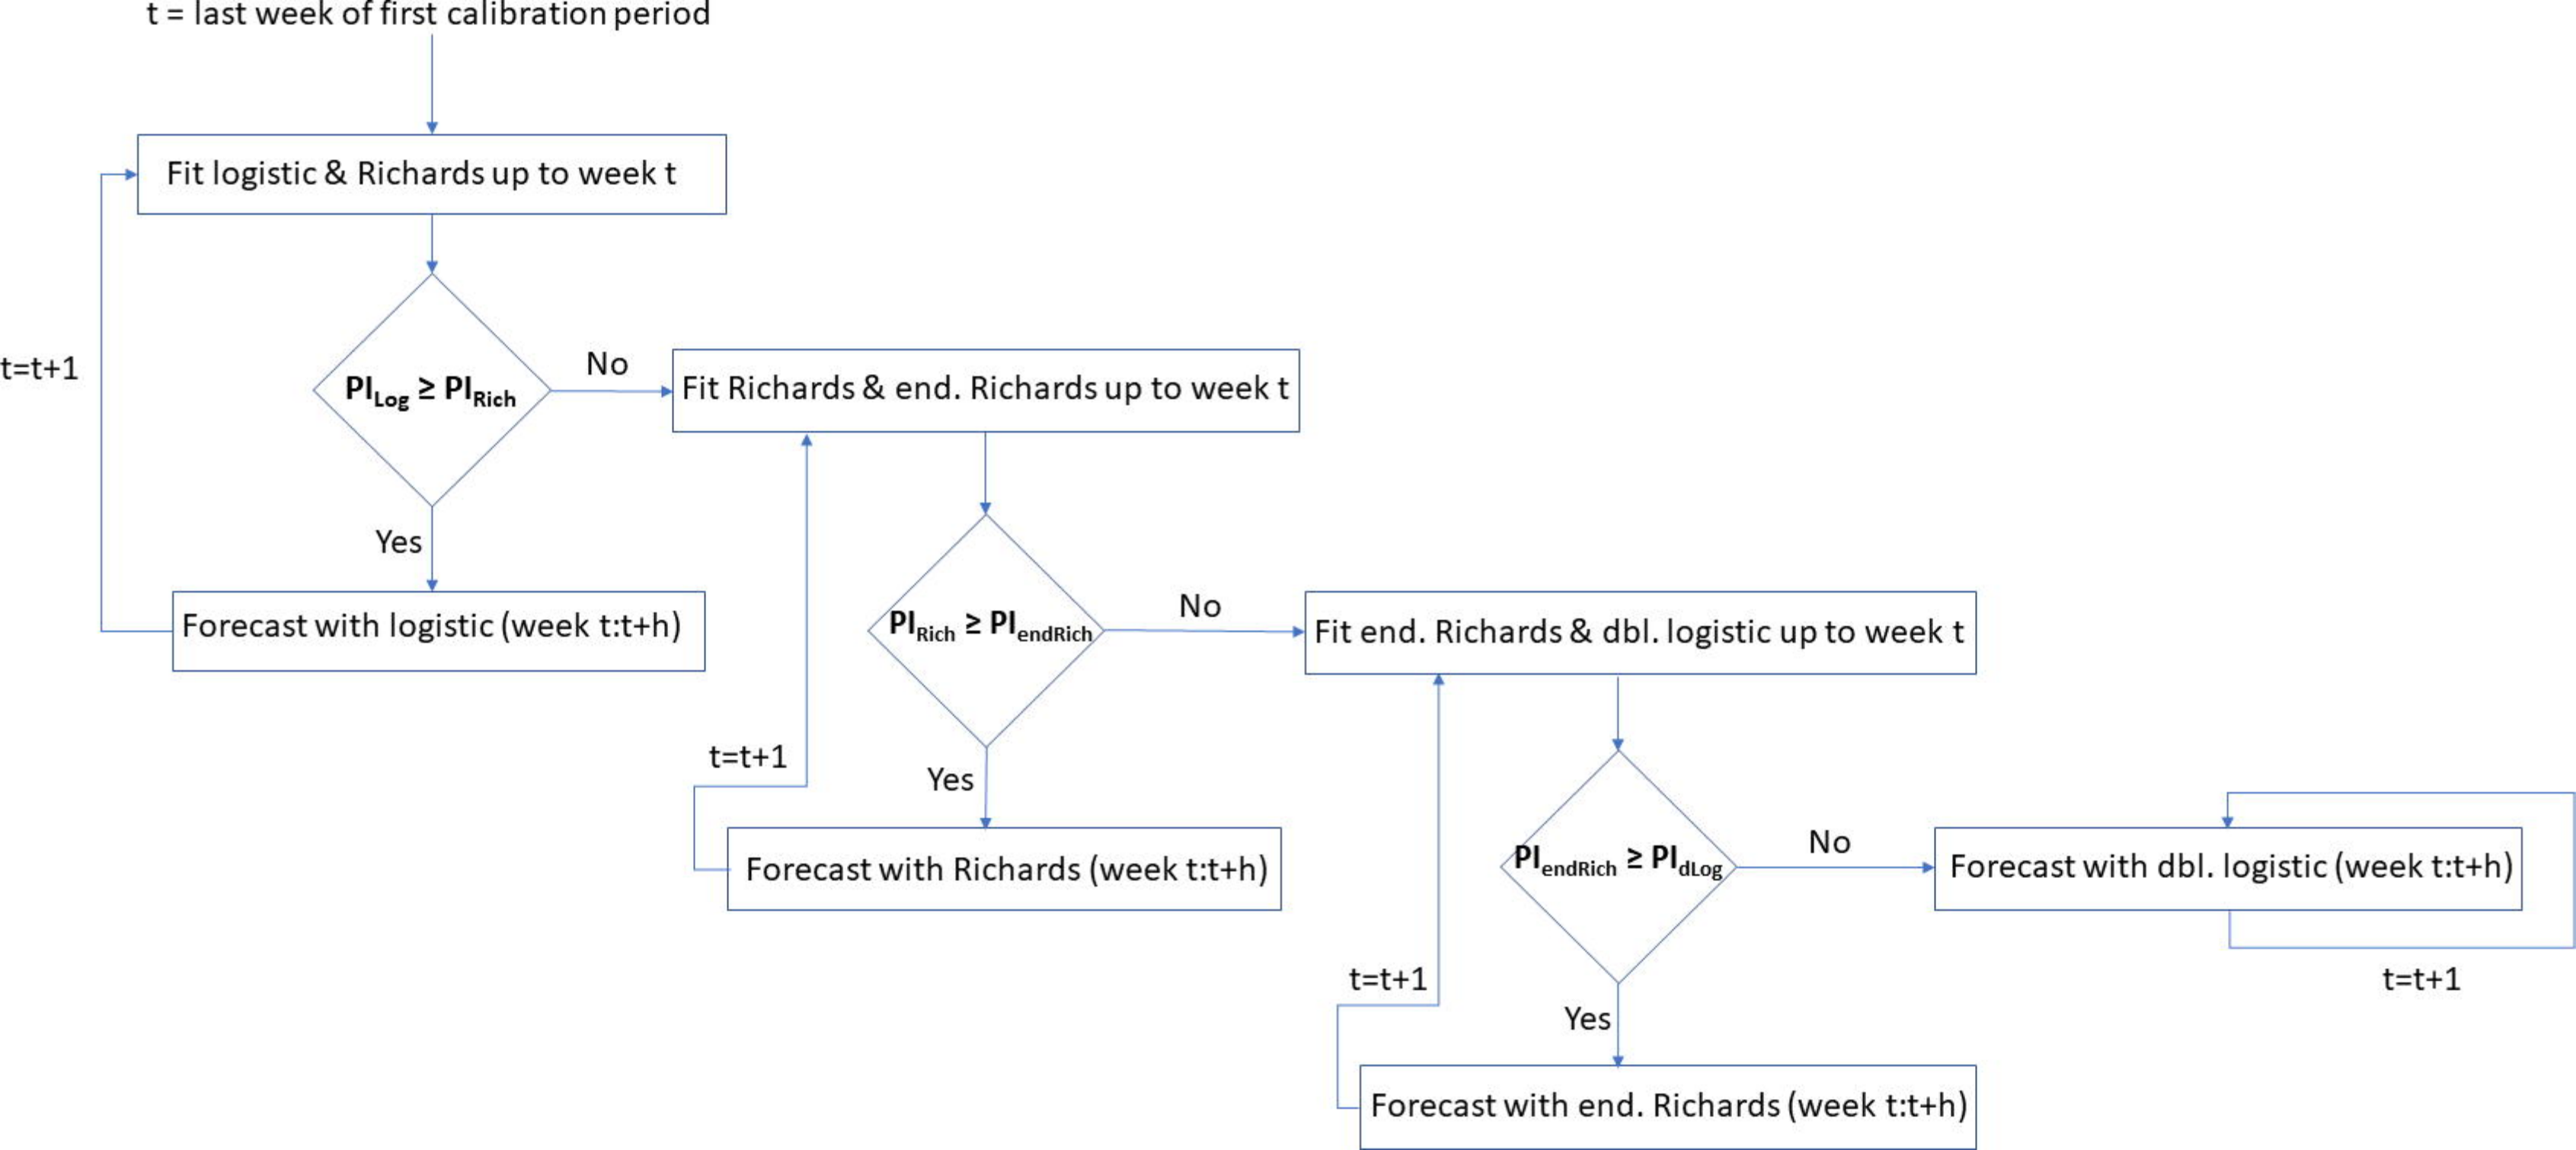

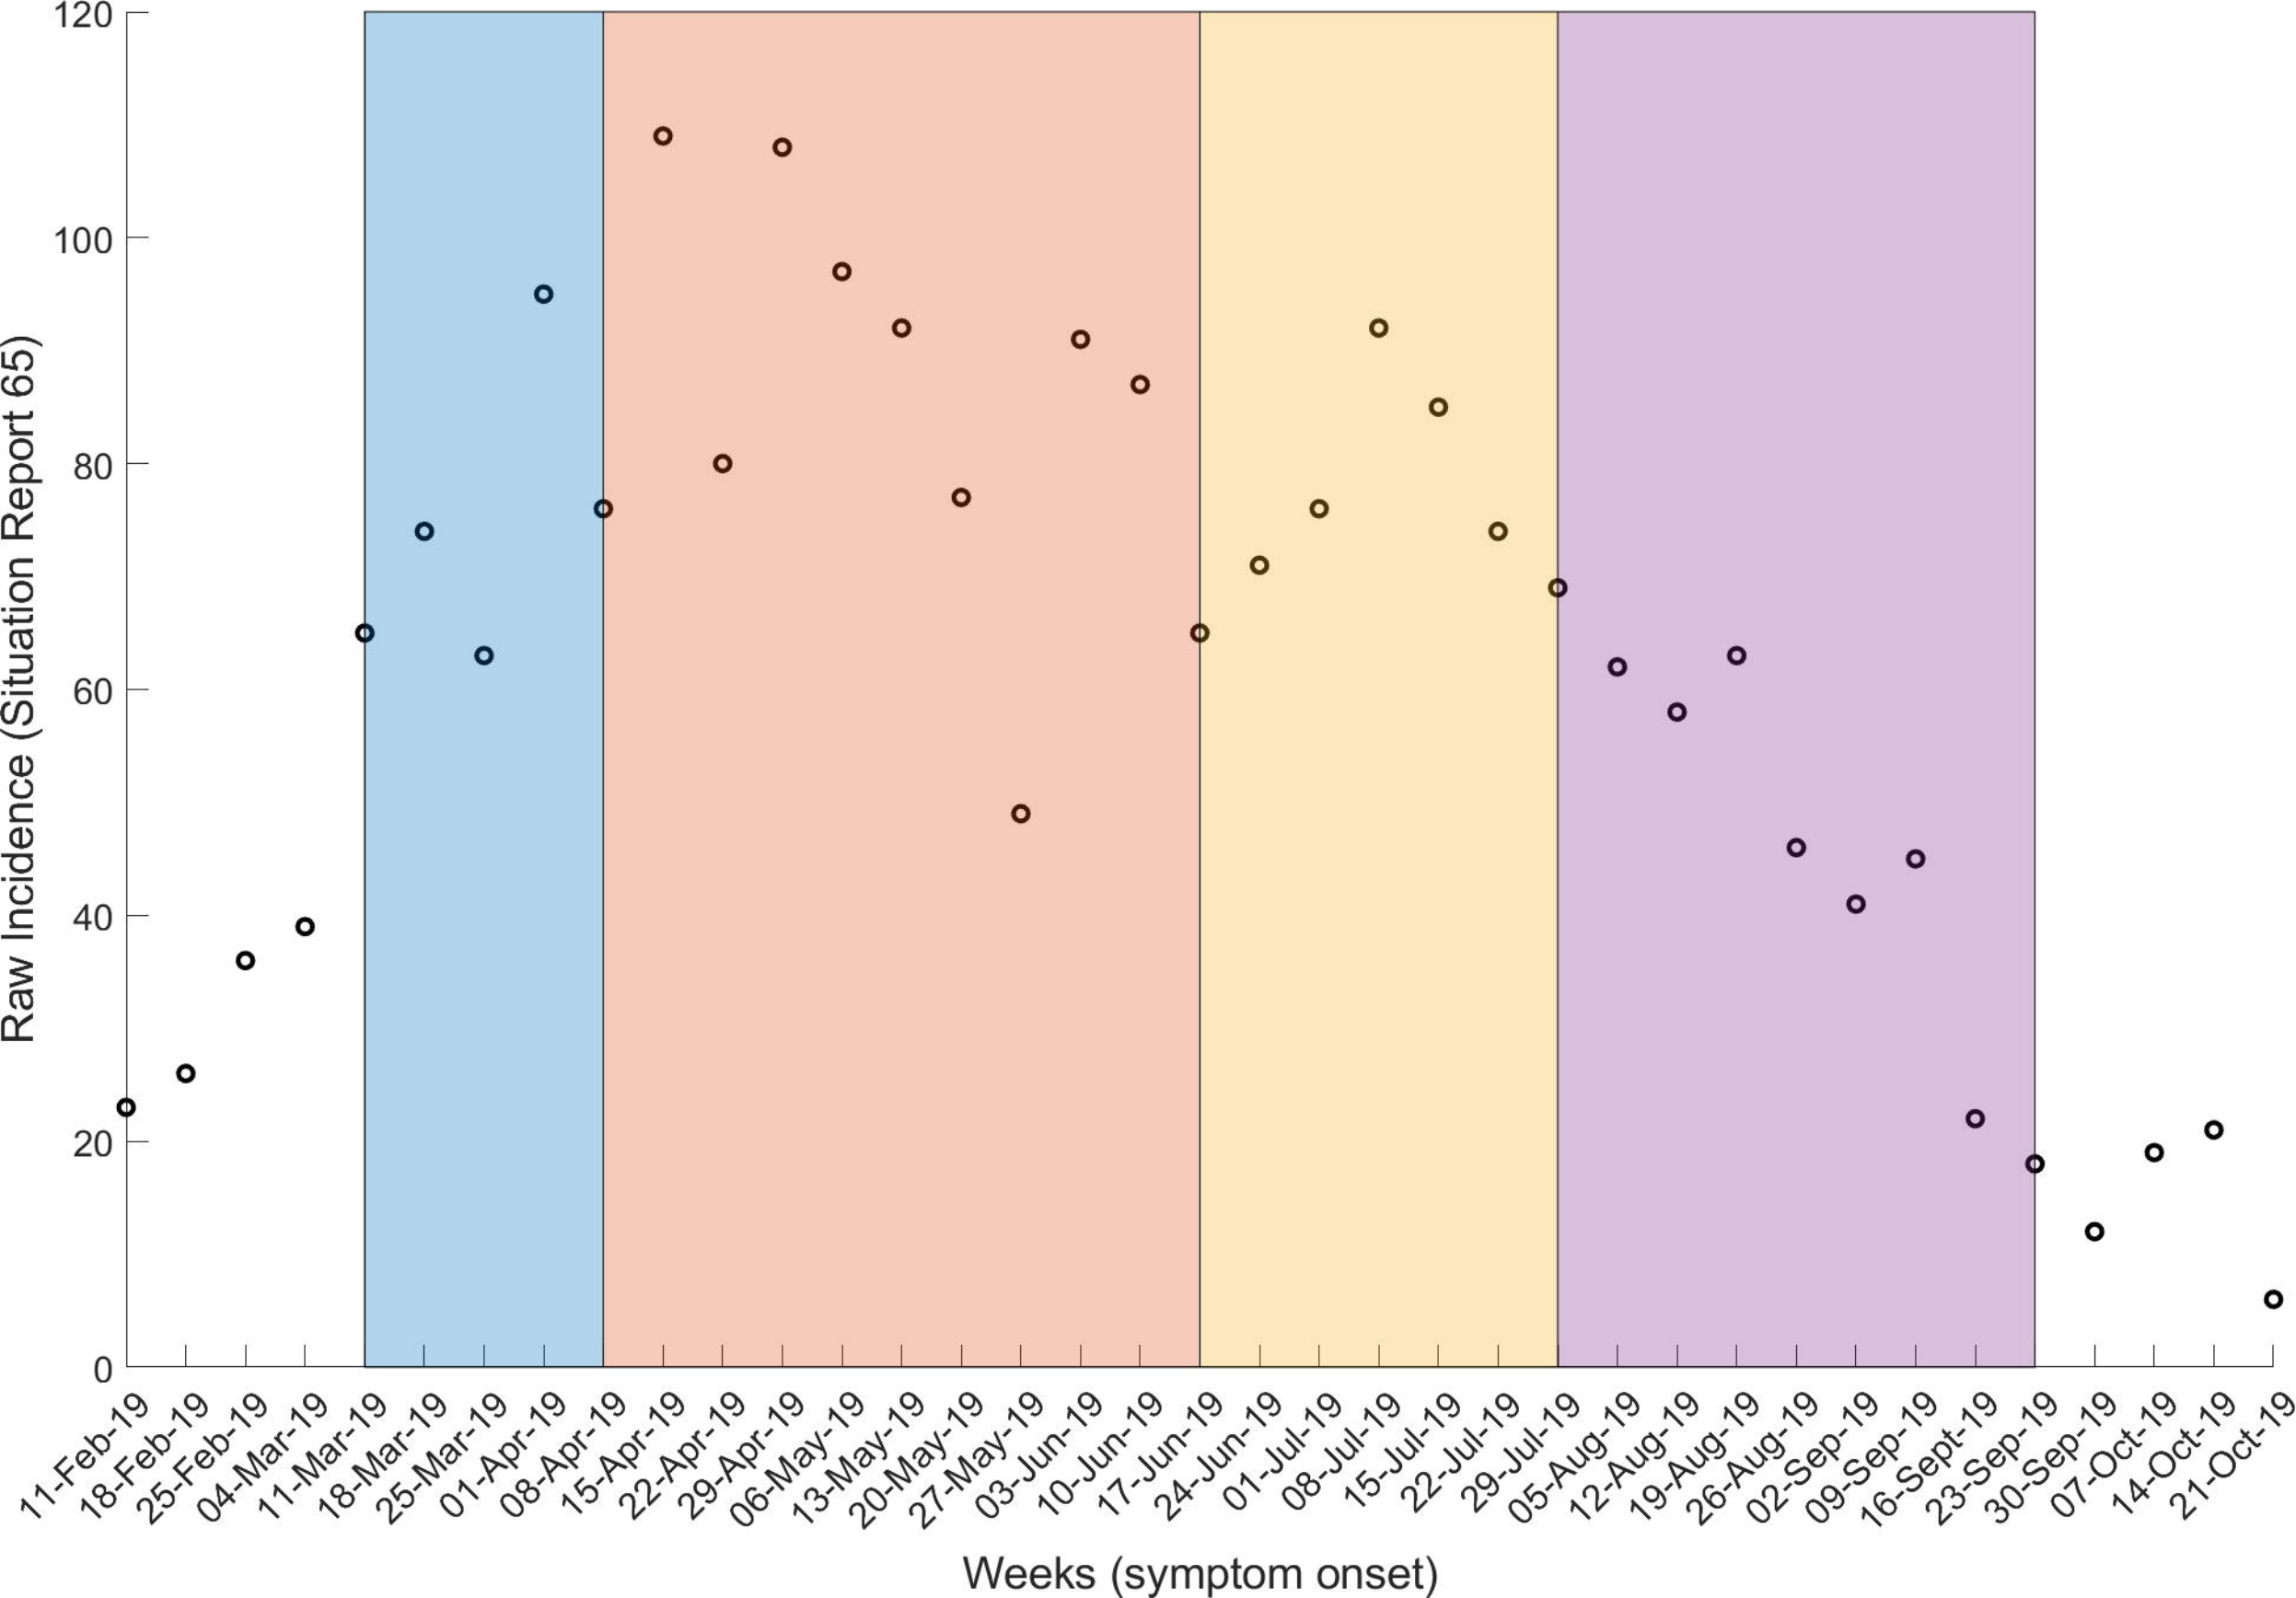

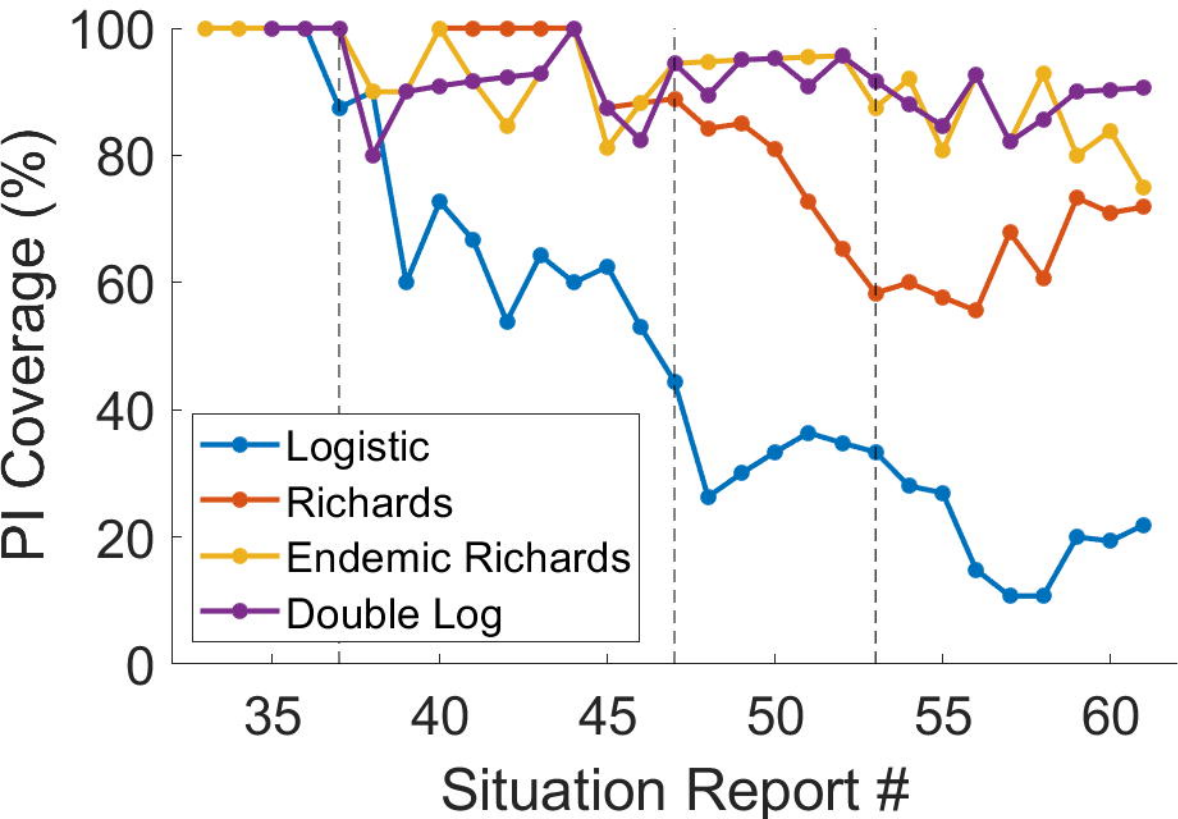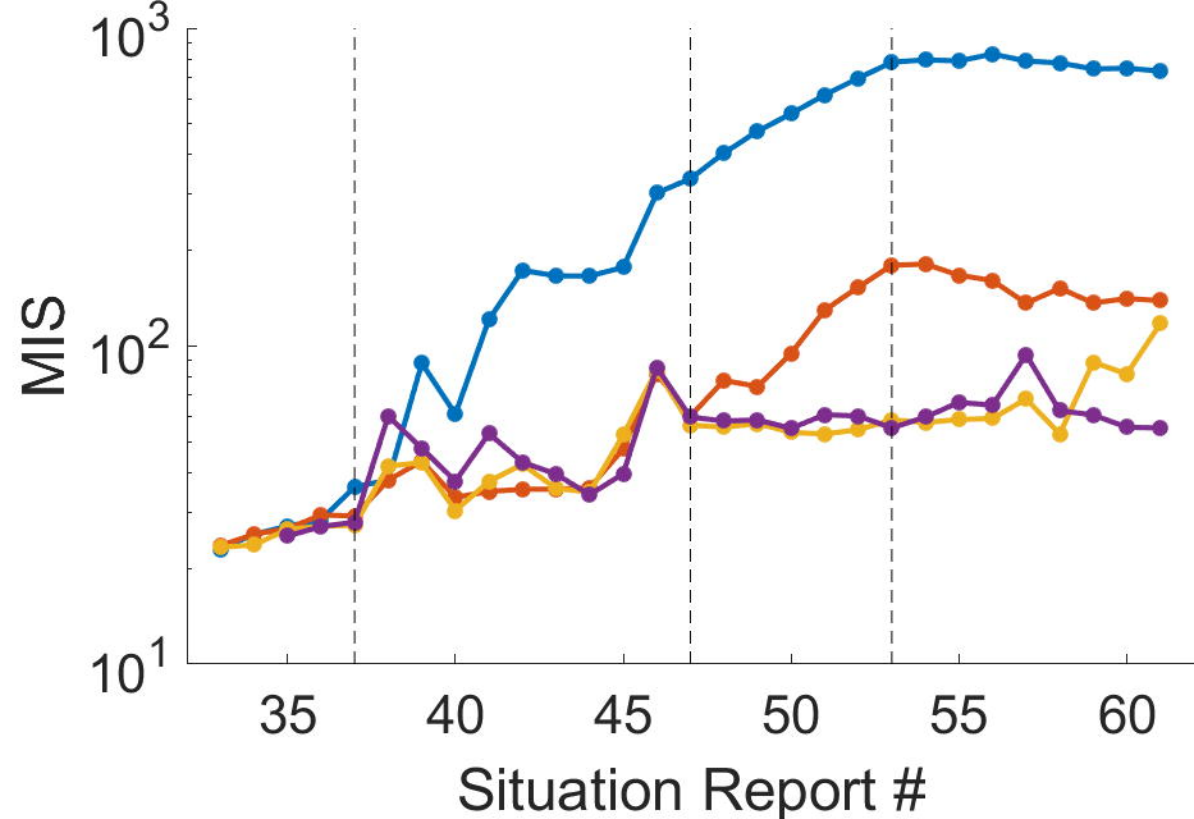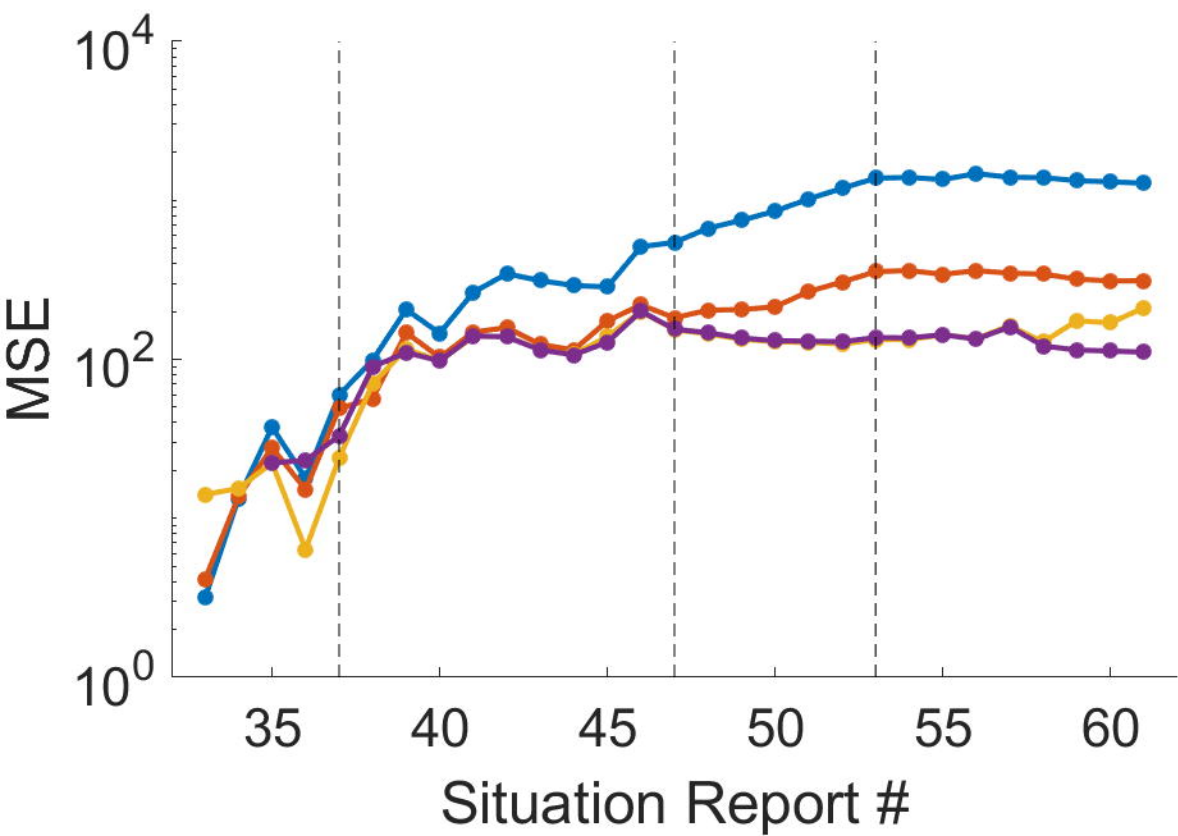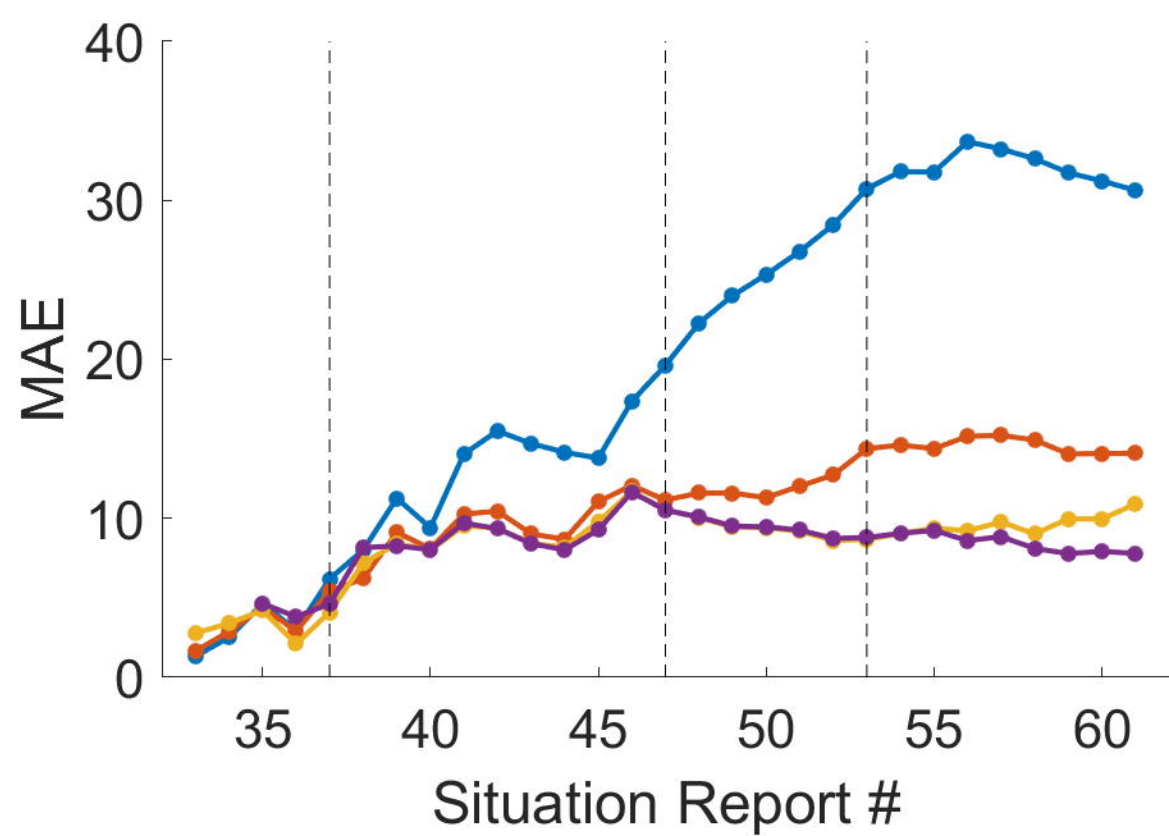



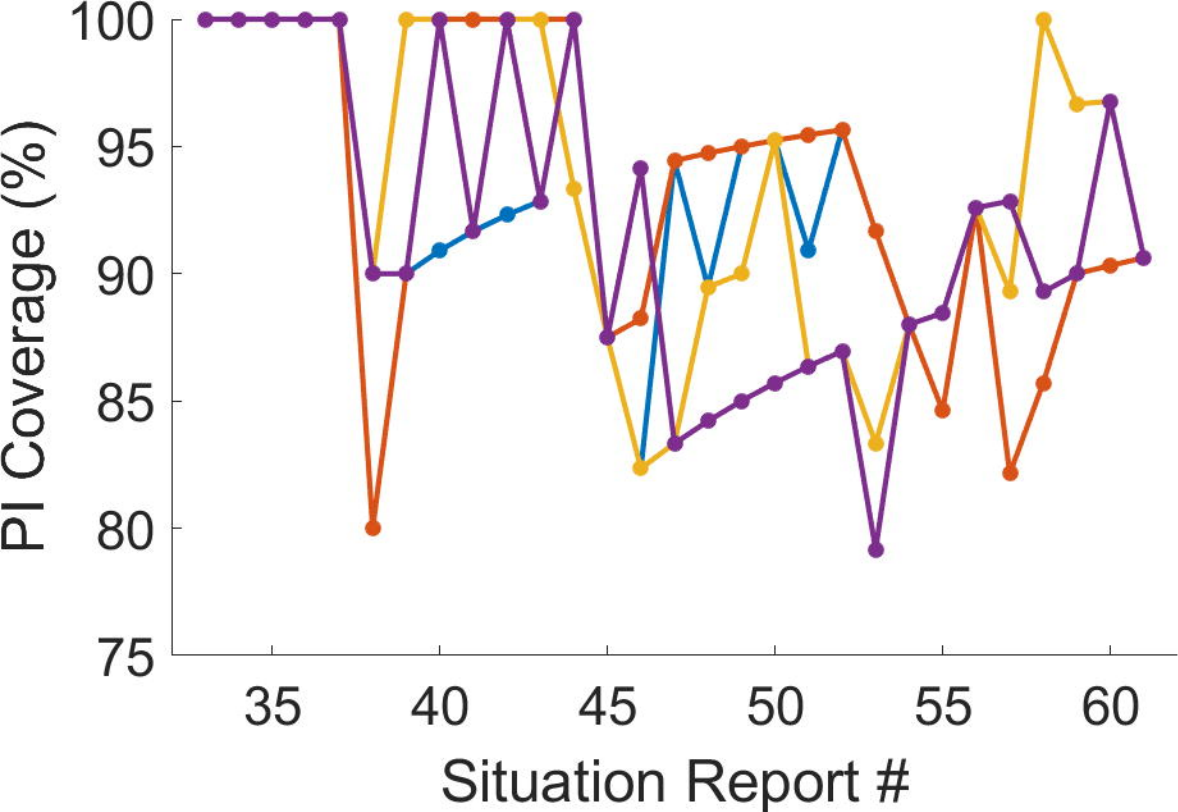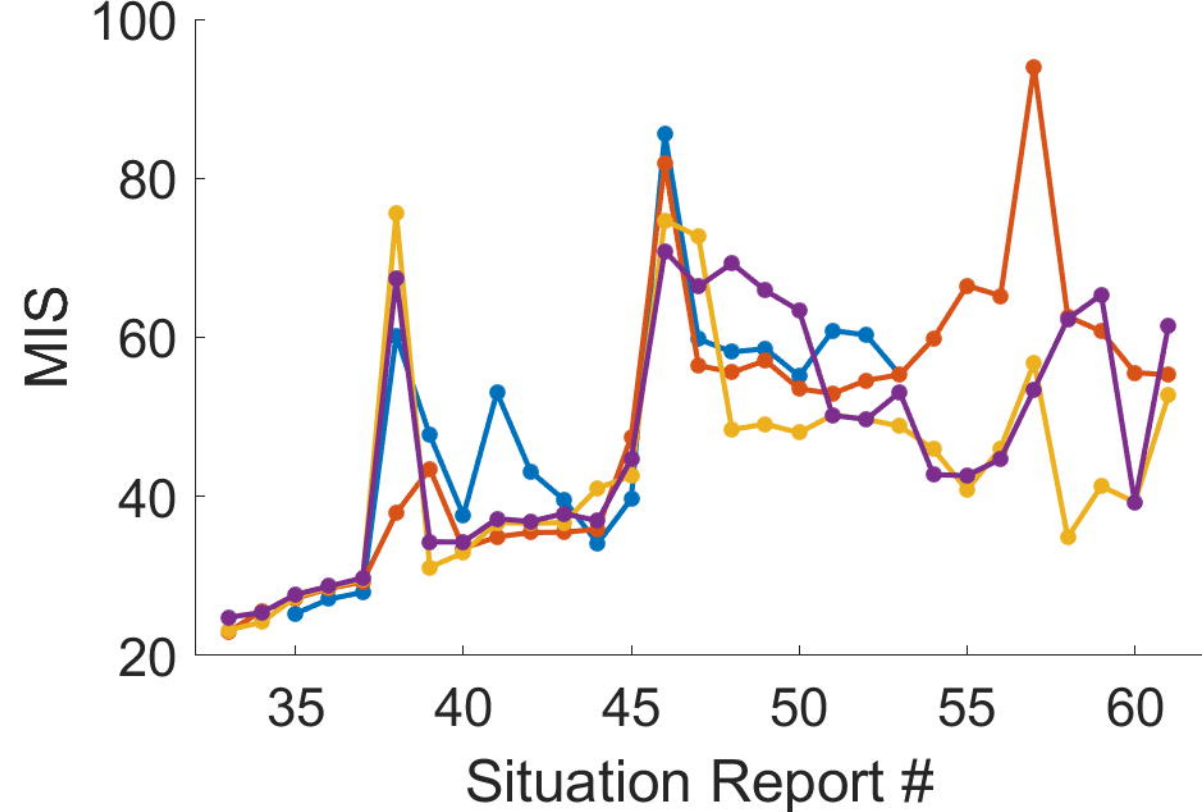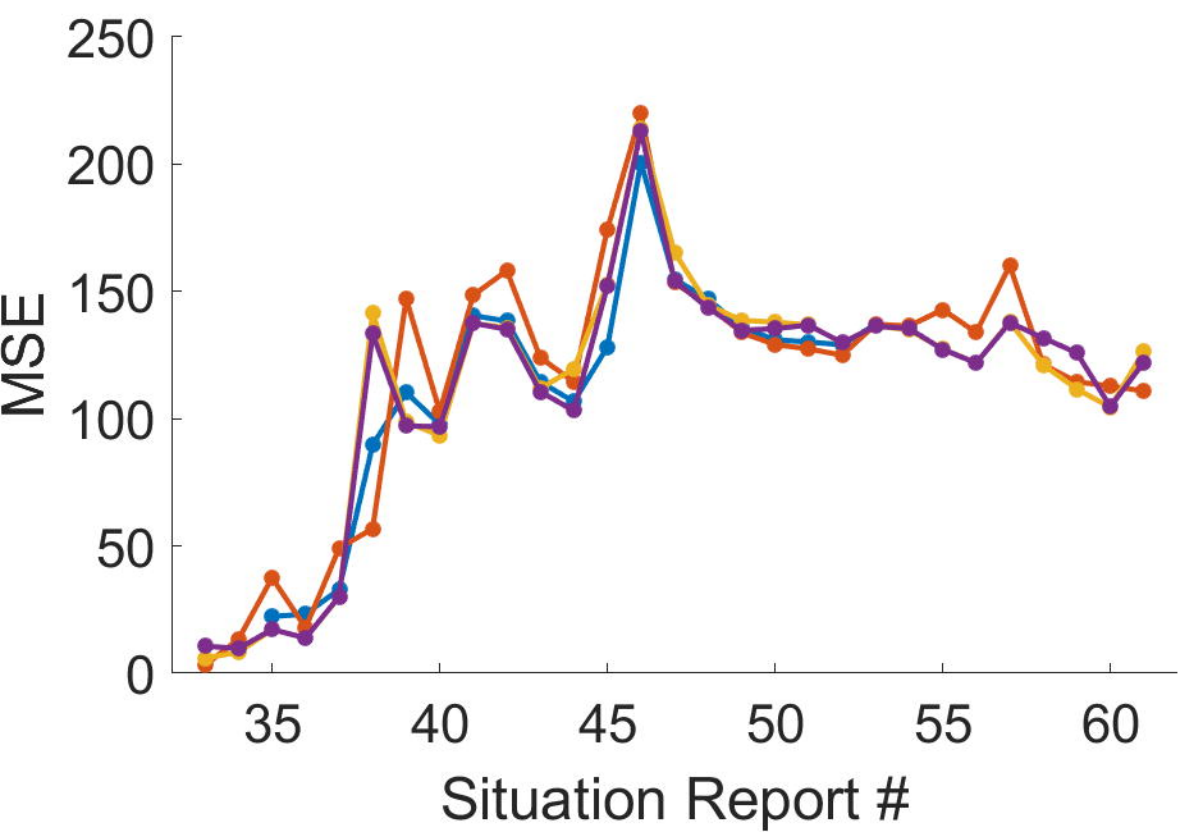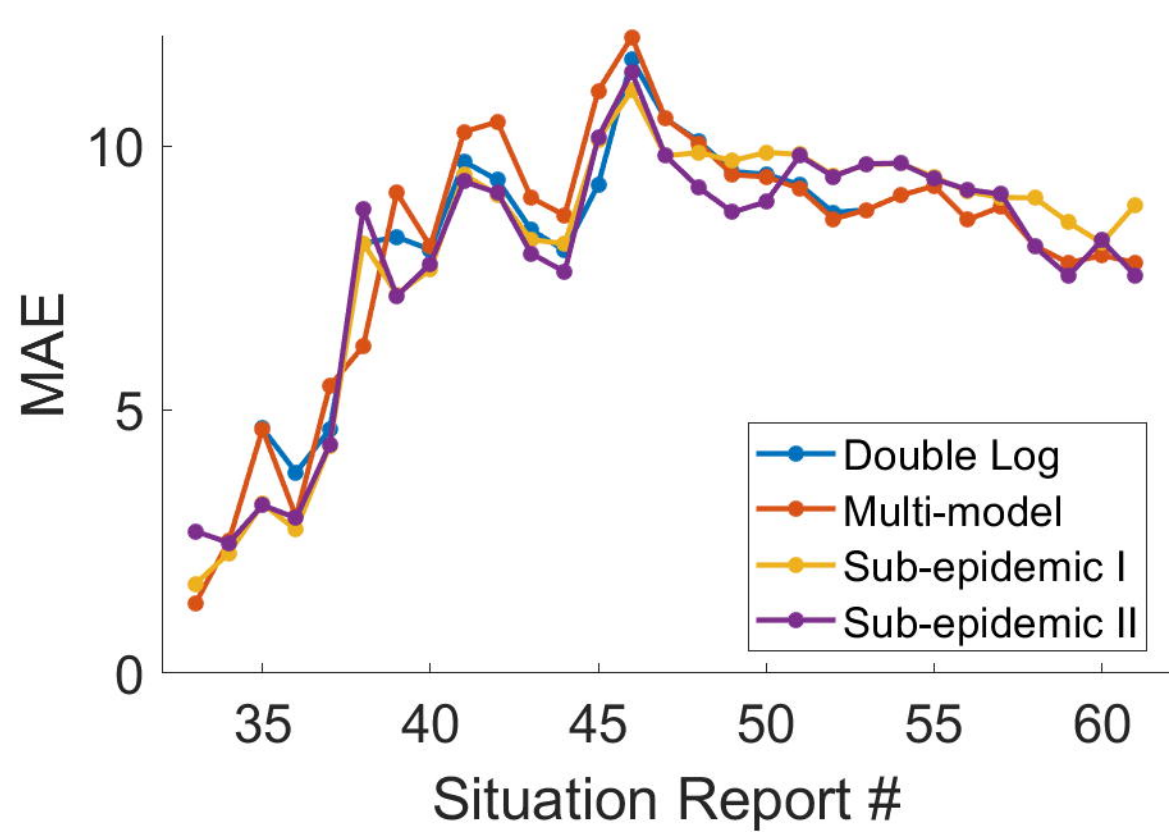

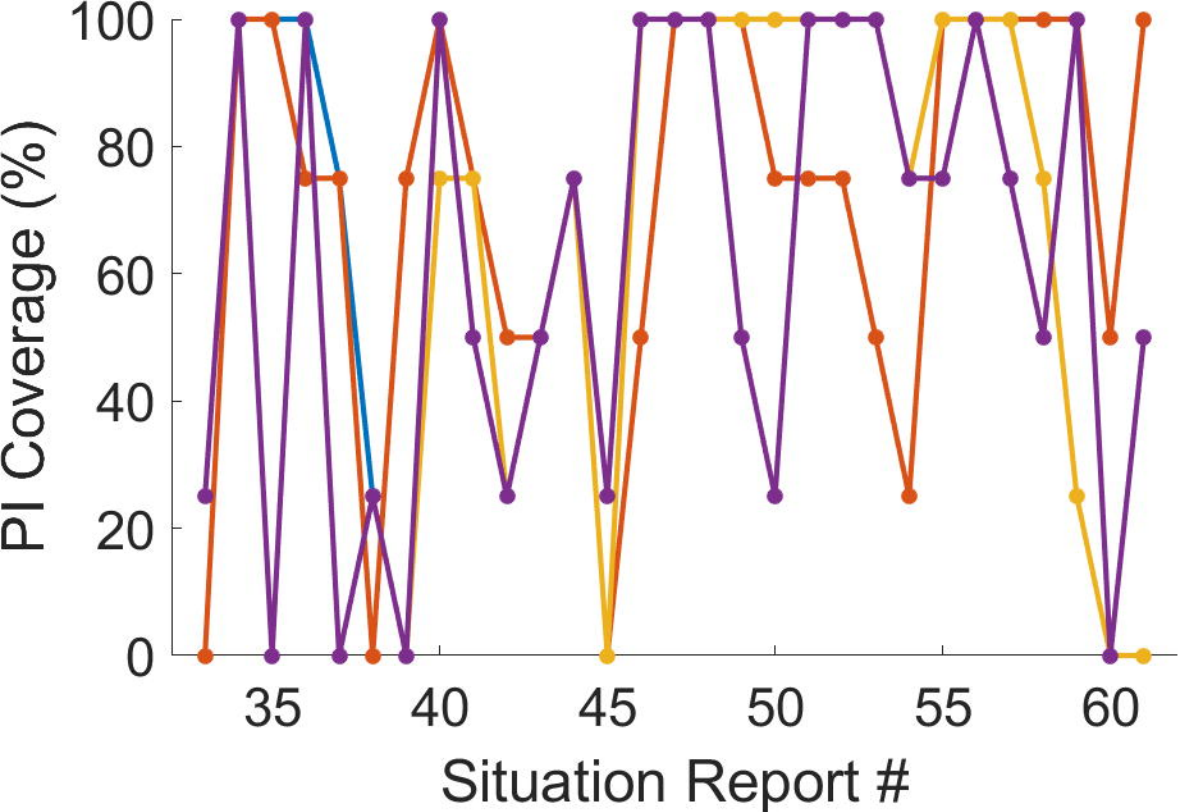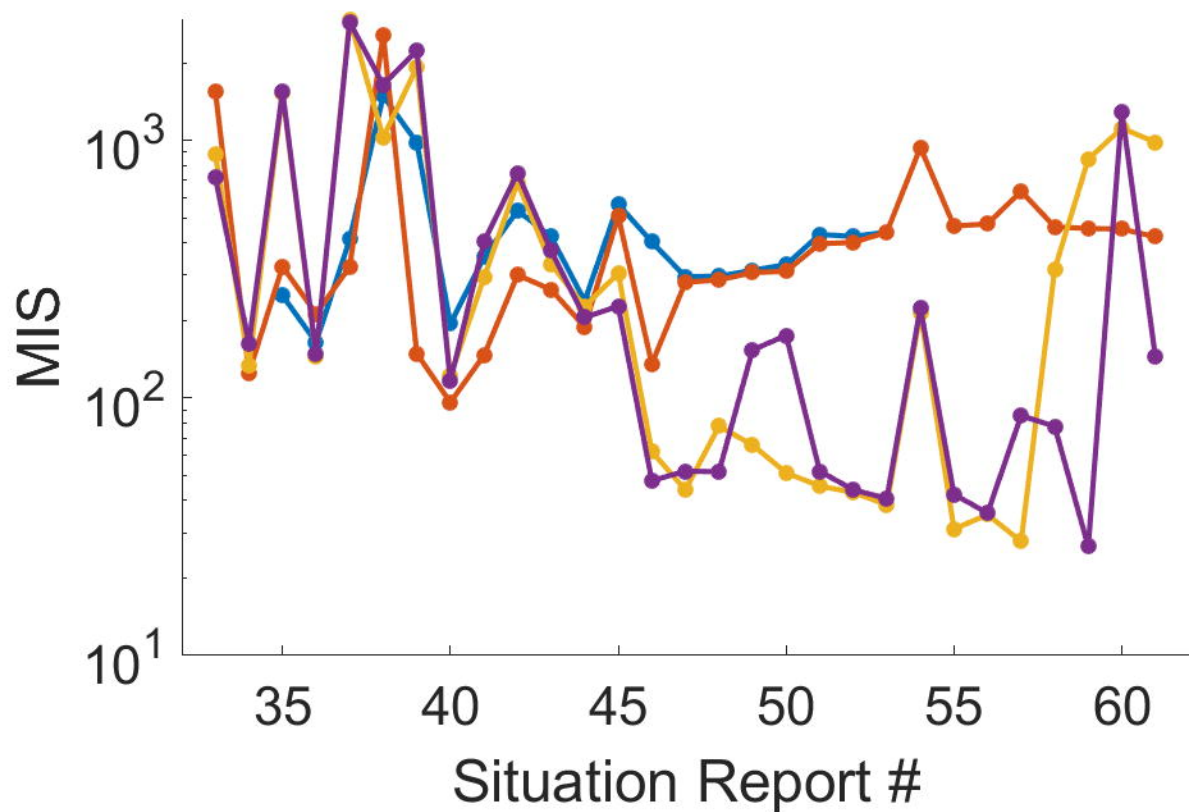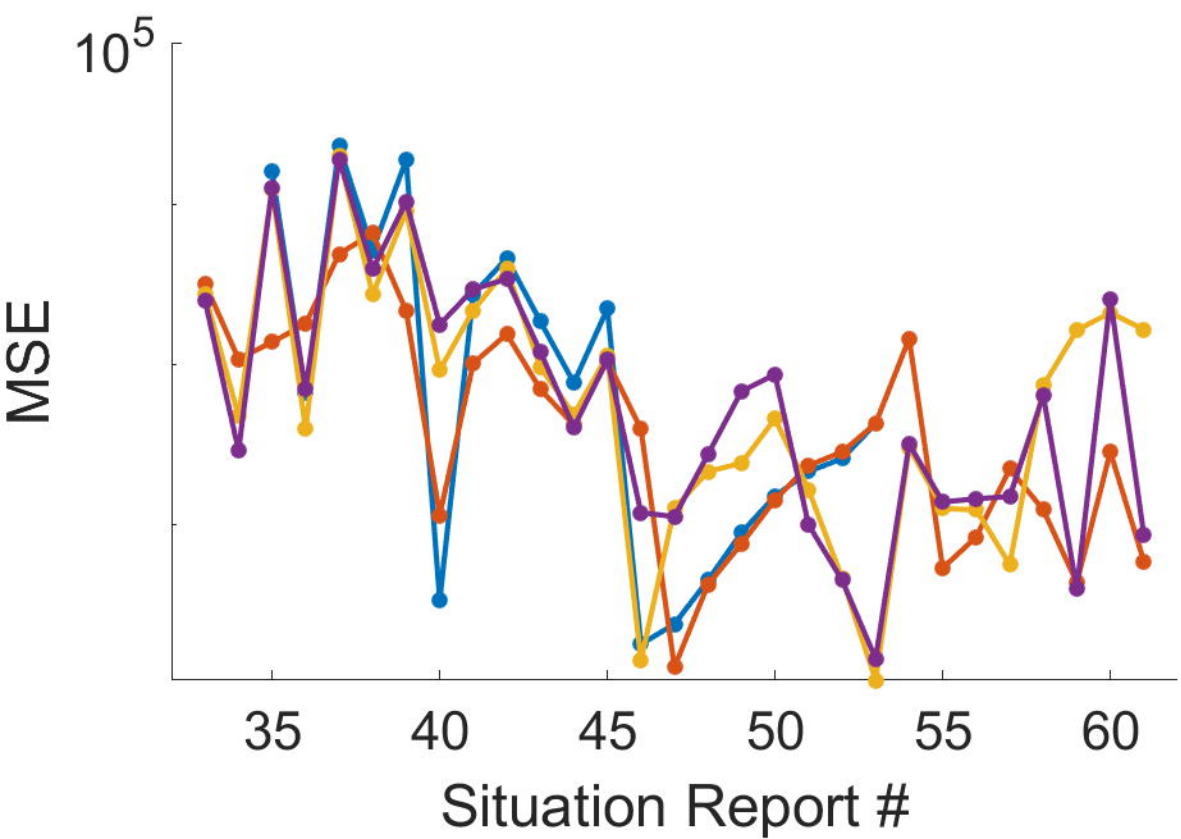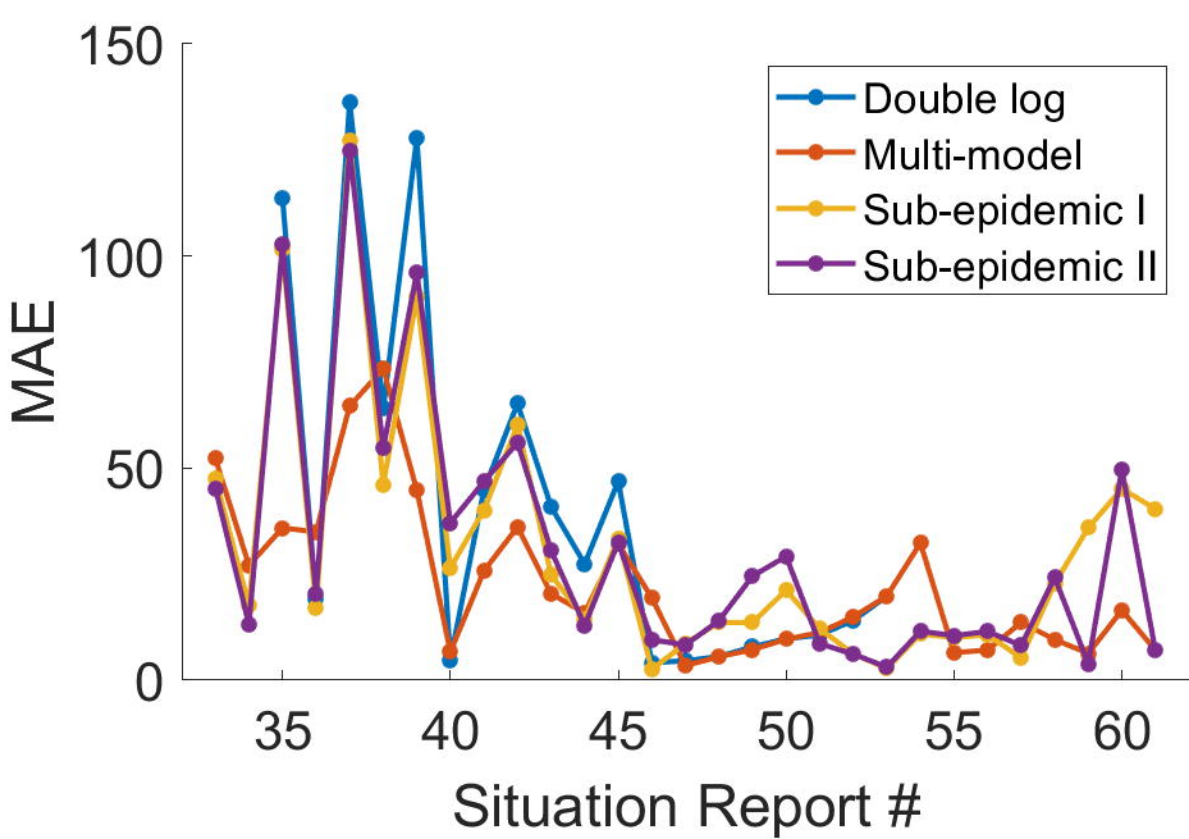

Source: https://medrxiv.org/content/medrxiv/early/2020/06/09/2020.06.07.20124867.full.pdf
